1 On the post-glacial spread of human commensal *Arabidopsis thaliana*: journey to the east

2

3

4 Che-Wei Hsu<sup>1</sup>, Cheng-Yu Lo<sup>1</sup>, Cheng-Ruei Lee<sup>1,2,3</sup>

5

6 1. Institute of Ecology and Evolutionary Biology, National Taiwan University, No 1, Sec 4,

7 Roosevelt Rd, Taipei 10617, Taiwan ROC

8 2. Institute of Plant Biology, National Taiwan University, No 1, Sec 4, Roosevelt Rd, Taipei

9 10617, Taiwan ROC

10 3. Genome and Systems Biology Degree Program, National Taiwan University, No 1, Sec 4,

11 Roosevelt Rd, Taipei 10617, Taiwan ROC

12

13 Author of correspondence:

14 Cheng-Ruei Lee

15 Room 1129, Life Science Building, No 1, Sec 4, Roosevelt Rd, Taipei 10617, Taiwan ROC

16 886-2-33662535

17 chengrueilee@ntu.edu.tw

18

19

20 **Abstract**

21

22 With the availability of more sequenced genomes, our understanding of the evolution and  
23 demographic history of the model plant *Arabidopsis thaliana* is rapidly expanding. Here we  
24 compile previously published data to investigate global patterns of genetic variation. While  
25 the Southeast African accessions were reported to be the most divergent among worldwide  
26 populations, we found accessions from Yunnan, China to be genetically close to the  
27 sub-Saharan accessions. Our further investigation of worldwide chloroplast genomes  
28 identified several deeply diverged haplogroups existing only in Eurasia, and the African  
29 populations have lower variation in many haplogroups they shared with the Eurasian  
30 populations. Bayesian inferences of chloroplast demography showed that representative  
31 haplogroups of Africa exhibited long-term stable population size, suggesting recent selective  
32 sweep or bottleneck is not able to explain the lower chloroplast variation in Africa. Taken  
33 together, these patterns cannot be easily explained by a single out-of-Africa event. Several  
34 Eurasian chloroplast haplogroups had rapid population growth since 10 kya, presumably  
35 reflecting the recent expansion of the weedy non-relicts across Eurasia. Our demographic  
36 analysis on a chromosomal region un-affected by relict introgression also suggested the  
37 European, Central Asian, and Chinese Yangtze populations diverged no earlier than 15 kya, in  
38 contrast to previous estimates of 45 kya inferred from whole genome that likely contains  
39 relict admixture. The most recent expansion is observed in the Yangtze population of China  
40 less than 2000 years ago. Similar to Iberia, the western end of non-relict expansion reported  
41 in our previous study, in this eastern end of Eurasia we find clear traces of gene flow  
42 between the Yangtze non-relicts and the Yunnan relicts. Genes under strong selection and  
43 previously suggested to contribute to adaptation in the Yangtze valley are enriched for traces  
44 of relict introgression, especially those related with biotic and immune responses. The  
45 results suggest the ability of non-relicts to obtain locally adaptive alleles through admixture  
46 with relicts is an important factor contributing to the rapid expansion across the  
47 environmental gradients spanning the eastern to the western coast of Eurasia.

48

49

50

## 51 Introduction

52 *Arabidopsis thaliana* is not only a model species in plant molecular biology, but also  
53 increasingly used to address major questions in ecology and evolution. The evolutionary  
54 history of this model plant is frequently revisited as more geographically diverse samples are  
55 collected and sequenced. The first continental-scale study of species-wide demography is  
56 published in 2016, where one globally distributed human commensal “non-relict” group as  
57 well as several “relict” groups located in relatively un-disturbed habitats were identified<sup>1</sup>.  
58 The follow-up study showed that the non-relicts originated recently near the Balkans and  
59 spread along the east-west axis of Eurasia, wiping out continental-wide relict populations  
60 while incorporating locally adaptive alleles from them<sup>2</sup>. As to the new world, the North  
61 American population arrived at around 1600 AD<sup>3</sup>, and most of them likely came from the  
62 region near southeastern England and northwestern Germany, carrying a charismatic  
63 inversion in chromosome 4<sup>4</sup>.

64 Durvasula *et al.*<sup>5</sup> investigated African *A. thaliana* and suggested an “out of Africa”  
65 demographic model, given the highest genomic variation and numbers of private alleles  
66 observed in African accessions. In this model, *A. thaliana* originated in Africa and diverged  
67 into three populations at ca. 90 kya: The Moroccan, Levantine and Southeast African groups.  
68 The migration of Moroccan population northwards to Iberia was illustrated as well as the  
69 Levantine migration wave westward into Europe and eastward to Central Asia at ca. 45 kya<sup>6</sup>.  
70 On the other hand, it remains unclear how *A. thaliana* first arrived Africa given all other  
71 *Arabidopsis* species were found in temperate Northern Hemisphere<sup>7</sup>, and the pattern that  
72 Africa contains most variation can be equally likely explained by a non-African origin of *A.*  
73 *thaliana* followed by non-relict expansion wiping out most Eurasian variation<sup>2</sup>.

74 Zou *et al.*<sup>8</sup> studied *A. thaliana* accessions from China and showed that the population in  
75 Yangtze River Basin arrived relatively recently. They also showed that genes associated with  
76 immune response as well as flowering time were significantly enriched in the list of selected  
77 genes in the Yangtze population. For flowering time, genetic mapping identified a candidate  
78 gene in chromosome 2, containing the *SVP* gene (AT2G22540) with a loss-of-function  
79 mutation accelerating flowering. It remains unclear what constitutes the source of adaptive  
80 allele in the Yangtze population – the sources of adaptation may be novel mutation, standing  
81 variation, or as we have shown for the Iberian non-relicts, introgression from locally  
82 adaptive relicts<sup>2</sup>.

83 Here we compile global data and re-investigate the evolutionary history of *A. thaliana*  
84 with two specific aims. (1) We used the maternally inherited chloroplast genomes to study  
85 the species history from a different perspective and investigate the out-of-Africa hypothesis

86 in the context of global samples. (2) We wish to clear up the evolutionary history and timing  
87 of non-relict expansion across Eurasia, especially whether the Chinese Yangtze population  
88 represents the eastern end of non-relict expansion and whether adaptive introgression also  
89 happened there.

90

91

92

## 93 **Results**

94

### 95 **Genetic variation in nuclear genomes**

96 To investigate the global patterns of *Arabidopsis thaliana* genomic variation, we  
97 compiled data from the 1,001 genomes project<sup>1</sup>, the African accessions<sup>5</sup>, and the Chinese  
98 accessions<sup>8</sup>. Phylogenetic tree using *Arabidopsis lyrata* as the outgroup<sup>7</sup> confirmed the  
99 previous observation that the Tanzanian and South African accessions (hereafter the “TZSA”  
100 clade) are most divergent to all others (Fig. 1a, Supplementary Fig. 1). Interestingly, two  
101 accessions from Yunnan, China are also genetically close to the TZSA clade, inconsistent with  
102 the single out-of-Africa event suggested previously<sup>5,6</sup>.

103 Of the two Yunnan accessions, one (SRR2204703) has heterozygosity typical of  
104 self-fertilizing *A. thaliana*, and the other (SRR2204316) has very high heterozygosity  
105 (Supplementary Fig. 2). While the higher heterozygosity may result from recent outcrossing  
106 events or DNA contamination, both samples have very low chloroplast heterozygosity as all  
107 other accessions (< 0.001), making DNA contamination less likely. Since the number of  
108 heterozygous sites in an individual reflects the number of SNPs between its two parents, we  
109 suspected the high heterozygosity of SRR2204316 might result from the cross between two  
110 genetically divergent groups, similar to a recent study in ancient humans<sup>9</sup>.

111 The ADMIXTURE<sup>10</sup>  $K = 2$  result supports this idea (Fig. 1b). While the Chinese Yangtze  
112 population is highly similar to typical Eurasian non-relicts and the Yunnan accessions are  
113 close to the TZSA group (Fig. 1a), admixture exists (Fig. 1b). We further investigated this with  
114 ABBA-BABA tests (Table 1). We first used non-relicts from Western Europe, which in theory  
115 had no gene flow with any of the Tanzanian/South African/Yunnan relict population, as a  
116 reference group to test whether the Yunnan accessions had gene flow from non-relicts. The  
117 sign of gene flow is highly significant for the highly heterozygous Yunnan accession ( $P =$   
118  $5.17E-25$ , Table 1 Test A) but not the other ( $P = 0.539$ , Table 1 Test A). Using the relatively  
119 un-admixed Yunnan accession as a reference, the Chinese Yangtze non-relicts showed strong  
120 signs of gene flow from the Yunnan relicts (Table 1 Test B). Finally, since both the highly

121 heterozygous Yunnan accession and the Chinese Yangtze population showed signs of  
122 admixture, the tests involving both groups are highly significant (Table 1 Test C). Therefore,  
123 similar to Iberia, the far-eastern end of Eurasia is also affected by the rapid expansion of  
124 non-relict population, with introgression from local relicts along the way.

125

## 126 **Genetic variation in chloroplast genomes**

127 Our results from the nuclear genome suggest a more complex demography than a  
128 single out-of-Africa event<sup>5,6</sup>. To better understand this, we investigated the chloroplast  
129 genomes, dated with 11 outgroup species<sup>7,11</sup>. Principal component analysis (PCA) of  
130 chloroplast variation within *A. thaliana* identified several genetic groups (Fig. 2a,  
131 Supplementary Fig. 3), which is consistent with the phylogenetic tree (Supplementary Fig. 4).  
132 After collapsing branches with low approximate likelihood ratio support (Supplementary Fig.  
133 5), we found that the *A. thaliana* chloroplast tree exhibits a basal polytomy (Fig. 2b), with  
134 seven major haplogroups branched off at roughly the same time: groups 1, 2, 8, 9, 10, and  
135 two monophyletic clades: 3 + 4 and 5 + 6 + 7. While studies based on the nuclear genomes  
136 showed that the African accessions contain higher polymorphism and are highly diverged  
137 from Eurasian populations<sup>5</sup>, we did not observe such pattern in chloroplast. Instead, the  
138 African accessions represent only a small subset of chloroplast variation (Groups 2, 3, and 7,  
139 Fig. 2b), suggesting that the chloroplast phylogeny captures more ancient demographic  
140 history than the divergence between African and European populations. Indeed, molecular  
141 dating with BEAST<sup>12</sup> confirmed that the major chloroplast haplogroups diverged at ca. 227  
142 kya (95% highest posterior density 121-340 kya, Supplementary Fig. 6,7). This considerably  
143 predates the inferred divergence time between African and Eurasian nuclear genomes  
144 (90-120 kya)<sup>5,6</sup>.

145 The spatial distribution of chloroplast haplogroups is uneven, with several highly  
146 diverged haplogroups existing only in Eurasia, and the African population containing only  
147 group 2, 3, and 7 (Fig. 3a). While Morocco has highest nuclear genomic variation<sup>5</sup>, we  
148 observed this only for group 3, where the variation decreases from Morocco northwards (Fig.  
149 3c), suggesting its Moroccan origin and later northward migration. Group 2 is only confined  
150 in Iberia and Morocco, with the former having higher variation (Fig. 3b). The monophyletic  
151 clade containing group 5, 6 and 7, on the other hand, has a global distribution with highest  
152 variation in Europe, especially the Balkan Peninsula (Fig. 3e). Therefore, even among the  
153 three haplogroups Africa shares with Eurasia, only one of them has African population  
154 containing higher variation. In summary, our observation is consistent with both hypotheses  
155 of (1) African origin of *A. thaliana* and complete lineage sorting between the African and the

156 Eurasian accessions or (2) a Eurasian origin and dispersal into different regions  
157 (southwestern Europe and northwestern Africa, Balkan and Levant, and south Asia), after  
158 which most Eurasian nuclear genomic variation was wiped out by the rapidly expanding  
159 non-relicts.

160

### 161 **Demography of chloroplast genomes**

162 We further used Extended Bayesian Skyline Plots<sup>13</sup> to investigate chloroplast  
163 demographic histories. Haplogroups typical of the Iberian and Moroccan region (group 2, 3,  
164 and 4) showed long-term stable population size (Fig. 4). The Eurasian haplogroups 1 and 5  
165 had population size increase since 20 kya, consistent with the post-glacial expansion with  
166 the retreat of ice sheet. Interestingly, for the globally distributed group 7, the central Asian  
167 group 8, the European group 6W, and the Chinese Yangtze group 6E, all had rapid population  
168 size increase since 10 kya, a time point close to the previously inferred rapid expansion of  
169 weedy non-relicts<sup>2,14</sup>. In addition, haplogroups 6 and 7 had highest genetic variation near  
170 the Balkan Peninsula (Supplementary Fig. 8c,d), corresponding to the inferred origin of  
171 non-relict expansion<sup>2</sup>.

172 For haplogroups shared by Morocco and Europe (groups 2, 3, and 7), we further  
173 investigated their demographic histories separately. While the Morocco population of all  
174 three groups still exhibited long-term stable population size (Supplementary Fig. 9), the  
175 European group 2 had population size increase since 20 kya (the first post-glacial expansion),  
176 and the European group 7 had size increase since 10 kya (the non-relict expansion). Taken  
177 together, compared to Europe, the Moroccan population was less influenced by either  
178 episode of demographic change, especially the second expansion wave wiping out most  
179 nuclear genomic variation across Eurasia<sup>2</sup>. While the fact that Morocco possesses most  
180 nuclear genomic variation could be interpreted as an African origin of *Arabidopsis thaliana*<sup>5,6</sup>,  
181 the complex demographic history we showed is an equally likely explanation.

182

### 183 **The eastern end of non-relict expansion**

184 While all current and previous<sup>2,14</sup> estimates suggested the non-relicts expanded around  
185 10 kya and almost all Eurasian *A. thaliana* are descendants of this population, some studies  
186 estimated the population divergence time between the European, Central Asian, and  
187 Chinese non-relict populations to be around 45 kya<sup>5,6,8</sup>. While these studies performed the  
188 multiple sequentially Markovian coalescent (MSMC) estimates<sup>15</sup> on the whole genome, we  
189 wish to note there are clear evidences that non-relict populations across Eurasia had  
190 introgression from distinct and highly diverged local relicts (Table 1 and ref. 2). Using the

191 whole genome, in some genomic regions one would be comparing between relicts and  
192 non-relicts or two highly diverged relict groups (e.g. between Tanzania and Morocco),  
193 thereby overestimating the true divergence time between the European, Central Asian, and  
194 Chinese non-relict populations. We therefore focus on a unique chromosomal translocation,  
195 where the non-relicts have a charismatic derived haplotype<sup>2,16</sup> (Supplementary Fig. 10).  
196 Since the two structural variants of the translocation cannot recombine effectively, genetic  
197 variation within the derived haplotype reflects demographic history of non-relicts<sup>2</sup>. Using  
198 only this 750 kb region, we first performed the same set of MSMC comparisons as Durvasula  
199 *et al.*<sup>5</sup> and successfully re-created similar patterns (Supplementary Fig. 11), demonstrating  
200 this region alone contains enough information to trace the demographic history. Based on  
201 the derived haplotypes in this region, the European, Central Asian, and Chinese Yangtze  
202 non-relict populations diverged between 5 to 15 kya (Fig. 5), consistent with the time of  
203 rapid population expansion in several chloroplast haplogroups (10 kya, Fig. 4) as well as the  
204 inferred timing of non-relict expansion<sup>2,14</sup>.

205 For non-relicts, the most notable recent expansion happened in the Chinese Yangtze  
206 population (Fig. 4). Assuming the North American population had a common ancestor  
207 around 1600 AD<sup>3</sup>, using simple genetic distance and assuming the same mutation rate, we  
208 estimated the Chinese Yangtze population having a common ancestor at 568 AD (estimated  
209 from chloroplast) or 823 AD (estimated from the chromosomal translocation region in  
210 chromosome 1<sup>2</sup>). The time point is consistent with *A. thaliana* entering China through  
211 central Asia with human activities, with the Silk Road being one possibility.

212 Given that the Yangtze population clearly had introgression from the Yunnan relicts (Fig.  
213 1b and Table 1), we further investigated whether introgression contributed to local  
214 adaptation of this population. We calculated the  $\hat{f}_d$  statistic<sup>17</sup> for 50-kb windows across the  
215 genome, from which gene flow between Yangtze population and Yunnan relicts was inferred  
216 (Supplementary Table 1). Then we compared the results with genes under strong selection  
217 in Yangtze population identified by Zou *et al.*<sup>8</sup> (Supplementary Table 1,2). Windows with  
218 these selected genes were found enriched in the top 5% tail of  $\hat{f}_d$  distribution (Fisher's  
219 exact test, odds ratio = 2.049,  $P = 0.007$ ). Genes both under strong selection and with  
220 evidences of relict origin were overrepresented for gene ontology (GO) terms associated  
221 with biotic interaction, immune response, and programmed cell death (Supplementary Table  
222 2), while strongly selected genes without strong traces of introgression (presumably  
223 representing novel mutations or standing variations within the invading ancestral Yangtze  
224 non-relicts) have no enrichment of any GO term. Taken together, much similar to the  
225 western end of Eurasia<sup>2</sup>, our results suggested the ability of the expanding non-relict

226 population to colonize the eastern end of Eurasia (the Yangtze River Basin) was also greatly  
227 facilitated by introgressions from local relicts.

228 Interestingly, in whole-genome phylogenetic tree the Yangtze population has long  
229 branches relative to other non-relict populations (Fig. 1a). To test whether this is caused by  
230 introgression from a highly diverged group (the Yunnan relicts) or natural selection  
231 accelerating the fixation of novel mutations in some genomic regions, we excluded the top  
232 20% windows with highest introgression (Supplementary Fig. 12a), any window containing  
233 positively selected genes (Supplementary Fig. 12b), or both (Fig. 12c). These trees remain  
234 similar to the whole-genome tree where the Yangtze population still has long branch length.  
235 It is likely that the Yangtze population exhibits higher mutation rate or more rapid life cycle  
236 resulting in more than one generation per year, and both hypotheses need to be formally  
237 tested. If so, time to the most recent common ancestor of Yangtze accessions would be  
238 more recent than our estimation.

239

## 240 Discussion

241

### 242 On ancient population structure

243 Combining currently available data from genome resequencing projects of *Arabidopsis*  
244 *thaliana*, here we revisit demographic history of *A. thaliana* from the global perspective. The  
245 “out of Africa” hypothesis states that the African population first separated into the  
246 Moroccan, Levantine, and Southeast African groups at ca. 90 kya followed by a migration  
247 event from Levant into Eurasia<sup>5,6</sup>. However, we observed that the Chinese Yunnan  
248 accessions are genetically closer to the Tanzanian and South African group than to any other  
249 group, which suggests more than one “out of Africa” events if the ancestral population is  
250 originated from Africa. For chloroplast, we observed several highly diverged haplogroups  
251 existing only in Eurasia, and Africa contains merely a subset of overall chloroplast variation,  
252 which hints that the ancestral population may not originate from Africa. Together, these  
253 results suggest another demographic scenario that is as possible as the “out of Africa”  
254 model (Fig. 6): Like all other species in the *Arabidopsis* genus, ancient *Arabidopsis thaliana*  
255 originated in temperate Eurasia and separated into the Moroccan/Iberian, Levantine, and  
256 South/Southwest Asian groups at ca. 90 kya. Later the Moroccan/Iberian and Levantine  
257 group migrated northwards into Eurasia while the Asian group dispersed into Tanzania and  
258 South Africa. At around 10 kya, the weedy non-relict group expanded across Eurasia. On the  
259 other hand, we acknowledge while the existence of more ancient chloroplast variation in  
260 Eurasia might indicate a Eurasian origin of *A. thaliana*, it is also likely that the ancient



261 variation once existed in Africa but was later lost due to strong bottleneck events or  
262 selective sweeps favoring a few chloroplast haplogroups. Chloroplast demography, however,  
263 shows long-term stable population size in Morocco for all haplogroups (Supplementary Fig.  
264 9), thus not lending strong support to the Moroccan chloroplast bottleneck or sweep  
265 scenario.

266 For both the “out of Africa” and the “into Africa” models, the most notable  
267 demographic turnover event is the recent replacement of many Eurasian relict populations  
268 by the weedy “non-relicts”<sup>1,2</sup>, which expanded along the east-west axis of Eurasia and left  
269 more relict genomic fragments in southern and northern Europe. Interestingly, this is  
270 supported by an independent study: Exposito-Alonso *et al.*<sup>18</sup> found that the same alleles  
271 increasing survival under extreme drought are enriched in the relict accessions and are  
272 concentrated in northern and southern Europe, a pattern predicted by the east-west  
273 non-relict expansion. The drastic demographic turnover is also responsible for only few  
274 private variants being observed in each regional Eurasian population<sup>5</sup>, which is a logical  
275 outcome since most Eurasian genomes descended only recently from a single population<sup>1,2</sup>.  
276 Meanwhile, the African population remained relatively isolated from Eurasia and retained  
277 much of the ancestral nuclear-genome variation. Therefore, our results suggest that the  
278 current patterns of global nuclear-genome variation (Africa containing most variation) is a  
279 consequence of non-relicts wiping out most ancient genetic variation in Eurasia<sup>2</sup>, which is  
280 compatible with both scenarios about ancient *A. thaliana* population structure (Fig. 6).

281 While no relict accession was found in northern central Asia, this region is enriched for  
282 the ancestral haplotype of the chromosome 1 translocation (Supplementary Fig 10), and  
283 these ancestral haplotypes form a unique genetic group when comparing to worldwide  
284 ancestral haplotypes<sup>2</sup>. In the present study, several Eurasia-only chloroplast haplogroups  
285 (group 8, 9, 10) also exist in this region (Fig 3). We therefore suspect another unique relict  
286 group might have existed near this region, which later became very rare or extinct.

287

### 288 **On the recently established Chinese population**

289 In the process of rapid expansion, populations in the expansion front constantly  
290 encounter novel environments, which may impede the speed and extent of expansion.  
291 Hence, how can a population rapidly spread across a wide geographical and environmental  
292 range, and what is the source of adaptation to these drastically different environments? We  
293 therefore focus on the origin and adaptation of Chinese Yangtze population for the second  
294 part of our investigation. We show that the Yangtze population originated no more than

295 2000 years ago and spread rapidly across the basin. Using the properly rooted phylogenetic  
296 tree, we showed that Yangtze population belongs to the non-relict group and are genetically  
297 the closest to Central Asian non-relicts (Fig. 1).

298 Zou *et al.*<sup>8</sup> performed genome-wide scans for signal of selection in the Yangtze  
299 population. Here we also investigated this result in the context of introgression from Yunnan  
300 relicts. We found that selected genes are enriched with signs of relict introgression, and  
301 genes with both signs of selection and introgression are overrepresented for  
302 immune-related functions. On the other hand, selected genes without signs of introgression  
303 do not have any significant gene ontology enrichment. Our results therefore suggest, among  
304 the various aspects of adaptation to the novel Yangtze River Basin environment, the  
305 adaptation to immune-related biotic stress is associated with gene flow with local relicts,  
306 which might have co-existed with local pathogens for a long time. Interestingly, for the  
307 western end of non-relict expansion in Iberia, relict introgression likely contributed to the  
308 adaptation to abiotic factor, as highly introgressed genes in Iberian non-relicts are enriched  
309 for GO terms including root development and ion metal transmembrane activity<sup>2</sup>. In the end,  
310 how can the non-relicts, a population near the Balkans, occupy such broad environmental  
311 gradient spanning more than 10,000 km across Eurasia within 10,000 years? While the  
312 mal-adaptation to novel environments in the expansion front may impede non-relict spread,  
313 our results suggest non-relicts frequently assimilated the biological distinctiveness of locally  
314 adaptive relicts. Together with human's long-term disturbance of native Eurasian vegetation  
315 and non-relicts' association with anthropogenically disturbed habitats<sup>1,2</sup>, the environmental  
316 resistance to non-relict expansion appears futile in most of Eurasia.

317

318

## 319 **Materials and Methods**

320

### 321 **Data source and SNP identification of nuclear genome**

322 In this study, we obtained *Arabidopsis thaliana* data from the 1,135 worldwide  
323 genomes<sup>1</sup>, 73 African genomes<sup>5</sup>, 116 Chinese genomes<sup>8</sup> and one *Arabidopsis lyrata* sample  
324 (SRR2040792)<sup>7</sup>. Reads were trimmed based on quality using SolexaQA<sup>19</sup>, and possible  
325 remaining adaptor sequences were removed with cutadapt<sup>20</sup>. Reads were mapped to the  
326 TAIR 10 reference genome using BWA 0.7.15<sup>21</sup>. Picard Tools  
327 (<http://broadinstitute.github.io/picard>) were used to mark duplicated read pairs, and the  
328 genotypes of each site in each accession (including non-variant sites and SNPs) were called  
329 following GATK 3.7 best practice<sup>22</sup>.

330 We further filtered the SNPs with QUAL < 100, QD < 20, call rate < 0.99, DP < 3 or > 2  
331 standard deviations from genome-wide average depth and removed 2 Chinese accessions  
332 (SRR2204178, SRR2204343) with high missing rate, resulting in 5,915,870 SNPs and 1323  
333 accessions.

334

### 335 **Alignment of *A. thaliana* population data with outgroups**

336 In addition to the *Arabidopsis thaliana* reference chloroplast genome (NC000932), we  
337 obtained the outgroup chloroplast genomes from the genera *Arabidopsis*, *Capsella*, and  
338 *Camelina*<sup>7,11</sup>: *Arabidopsis lyrata* subsp. *petraea* (LT161948), *Arabidopsis lyrata* subsp. *lyrata*  
339 (LN877383), *Arabidopsis halleri* subsp. *halleri* (LN877382), *Arabidopsis carpatica* (LT161918),  
340 *Arabidopsis arenosa* subsp. *arenosa* (LT161904), *Arabidopsis nitida* (LT161970), *Arabidopsis*  
341 *pedemontana* (LN877384), *Arabidopsis cebennensis* (LN877381), *Capsella rubella*  
342 (LN877385), *Capsella bursa-pastoris* (NC\_009270), and *Camelina sativa* (LN877386).

343 All twelve chloroplast genomes were annotated with Verdant<sup>23</sup>, and about 90 protein  
344 coding genes were identified in each sequence. We retained genes existing in all species and  
345 excluded those within the two inverted repeat regions, resulting in 67 orthologous genes  
346 with one-to-one relationship in all species. The 67 genes were separately aligned with  
347 MUSCLE 3.8.31<sup>24</sup>. Based on this alignment of *A. thaliana* reference chloroplast genome with  
348 outgroups species, we used custom R scripts to “paste” the Illumina-based *A. thaliana*  
349 accession data<sup>1,5,8</sup> onto the among-species alignment. All following analyses were based on  
350 this concatenated dataset of 67 protein coding genes.

351 To remove possible confounding effect from heteroplasmy, we excluded accessions  
352 with heterozygous SNPs > 0.5% of all SNPs. For all remaining accessions, any heterozygous  
353 genotype call was transformed to missing data, and accessions with > 1% missing data  
354 among all SNPs were excluded.

355

### 356 **Patterns of chloroplast and chromosome 1 translocation polymorphism**

357 For chloroplast, bi-allelic SNPs of 67 protein coding genes were called using vcftools<sup>25</sup>  
358 after conversion of fasta alignment format to vcf format in TASSEL<sup>26</sup>. Focusing on bi-allelic  
359 sites with no missing data and zero heterozygosity, we identified 760 sites polymorphic  
360 within *A. thaliana* and 2124 fixed between *A. thaliana* and any one outgroup species. SNPs  
361 were identified in chromosome 1 translocation following procedures of previous studies<sup>2,16</sup>.  
362 PCA was done with R package adegenet<sup>27</sup> and visualized with R package ggplot2<sup>28</sup>.

363 Accessions of *Arabidopsis thaliana* were assorted into groups (geo-clusters) according  
364 to geographical location where they were sampled (Supplementary Table 3). Diversity of

365 each chloroplast within each geo-cluster was then estimated by pair-wise genetic distance<sup>29</sup>.  
366 To account for uneven sampling, the average genetic variation of 100 resampling trials was  
367 obtained for each geo-cluster. For each re-sampling trial, 100 samples were randomly drawn  
368 with replacement within each geo-cluster. Groups with less than 3 samples in each geo  
369 cluster were ignored. All the calculation and plots were completed in R with customize  
370 scripts and package ggplot2<sup>28</sup>. Pie charts were plotted with R package ggplot2<sup>28</sup> as well.

371

### 372 **Phylogenetic reconstruction and divergence time estimation**

373 5,915,870 nuclear SNPs of 1323 accessions (including *Arabidopsis lyrata*) were used to  
374 construct nuclear neighbor-joining tree. The pair-wise distance is calculated by dividing  
375 number of SNP difference between pairs with total number of non-missing sites that are  
376 polymorphic within 1323 accessions.

377 1312 chloroplast haplotypes of 2124 bi-allelic SNPs were converted into phylip format  
378 and submitted to maximum-likelihood-based phyML 3.0<sup>30</sup> for reconstruction of phylogenetic  
379 tree. Substitution model selection was done by SMS<sup>31</sup> with Bayesian Information Criterion  
380 (BIC). Subtree pruning regrafting (SPR) was used as tree searching algorithm and the branch  
381 support was estimated by approximate likelihood ratio test (aLRT SH-like). Branches with low  
382 support (aLRT < 0.5) were collapsed with TreeGraph2<sup>32</sup>. The collapsed maximum likelihood  
383 tree was visualized and colored in FigTree version 1.4.3  
384 (<http://tree.bio.ed.ac.uk/software/figtree/>).

385 Divergence time among haplogroups was estimated with BEAST version 2.5.0<sup>12</sup>. The  
386 collapsed ML tree of 426 unique chloroplast haplotypes was constructed as described  
387 previously and served as starting tree for BEAST after it was converted ultrametric and had  
388 the node ages fit within constraints of calibration points using R package ape<sup>33</sup>. Three  
389 calibration points estimated in previous studies<sup>7,11</sup> were adopted, the root height  
390 (divergence time between genus *Arabidopsis* and *Camelina*, *Capsella*) was set to 8.16 Mya;  
391 divergence time between genus *Capsella* and *Camelina* was set to 7.36 Mya; and the  
392 divergence time between *Arabidopsis thaliana* and other species in *Arabidopsis* genus was  
393 set to 5.97 Mya. Normal distribution with 1 mya standard deviation was used for all the  
394 three calibration points.

395 Two independent MCMC runs with  $5 \times 10^8$  chain length were generated with Calibrated  
396 Yule Model for priors and Relaxed Clock Log Normal for clock model. GTR was chosen as site  
397 model according to SMS. Parameters of MCMC trees were sampled every  $5 \times 10^4$  generations  
398 and submitted to Tracer version 1.6 (<http://tree.bio.ed.ac.uk/software/tracer/>) for quality  
399 control of MCMC chains. LogCombiner<sup>12</sup> was implemented to combine two independent

400 runs. A maximum clade credibility (MCC) tree was constructed using 18000 output trees of  
401 LogCombiner with 10% burn-in in TreeAnnotator<sup>12</sup>. The MCC tree was then visualized and  
402 colored in FigTree version 1.4.3 (<http://tree.bio.ed.ac.uk/software/figtree/>).

403

#### 404 **ABBA-BABA and $\hat{f}_d$ estimation**

405 Python and R scripts were downloaded from  
406 ([https://github.com/simonhmartin/genomics\\_general](https://github.com/simonhmartin/genomics_general)) for ABBA-BABA and  $\hat{f}_d$  estimation<sup>17</sup>.  
407 Genome-wide D statistics were estimated in R followed the instruction of  
408 (<http://evomics.org/learning/population-and-speciation-genomics/2018-population-and-speciation-genomics/abba-baba-statistics/>), West European population (EU) was treated as  
409 Pop1, Yangtze population (YA) was treated as Pop2, Yunnan (YU) (the less admixed accession)  
410 was treated as Pop3 and *Arabidopsis lyrata* was treated as outgroup. Sliding window analysis  
411 of  $\hat{f}_d$  estimation between Yangtze population and Yunnan (the less admixed accession) was  
412 done using the Python scripts. Window size was set to 50 kb with 20 kb step, each window  
413 containing at least 100 SNPs. Windows with top 5 % highest  $\hat{f}_d$  values were viewed as  
414 regions with strong introgression between Yangtze and Yunnan. The selected genes in  
415 Yangtze population<sup>8</sup> within/outside the window of introgression were then submitted to  
416 agriGO v2.0<sup>34</sup> for gene ontology analysis.

418

#### 419 **Multiple sequentially Markovian coalescent analysis (MSMC)**

420 Relative cross coalescence rate was estimated using MSMC v2<sup>15</sup>. Sequences of  
421 chromosome 1 translocation (Chr1:20271447-21032307) were used as input. Generation  
422 time was set at 1 year and mutation rate of  $7.1 \times 10^{-9}$  was assumed according to previous  
423 studies<sup>5,8</sup>. Results were then plotted in R.

424

#### 425 **Extended Bayesian skyline plot**

426 Extended Bayesian Skyline analysis was done using BEAST v2.5.0<sup>12</sup> with fixed number of  
427 2124 chloroplast genome polymorphisms. Parameters were set in BEAUti 2<sup>12</sup>, HYK  
428 substitution model with empirical frequency was chosen and the clock model was set to  
429 strict clock with clock rate estimated by previous Calibrated Yule Model (0.0223). Priors were  
430 set to Coalescent Extended Bayesian Skyline with 0.5 population model factor and default  
431 value for the rest of parameters. Sufficient length of MCMC chains were run to achieve  
432 acceptable ESS values, which indicates the model is well-mixed. The ESS values were  
433 estimated in Tracer v1.6.0<sup>12</sup>, and the results were plotted in R.

434

435

436

437

438 **Acknowledgements**

439 We thank Thomas Mitchell-Olds and the Lee lab member for comments to this  
440 manuscript. We thank all researchers who have made the *Arabidopsis* genetic resources and  
441 data publicly available. We are grateful to Computer and Information Networking Center,  
442 National Taiwan University for the support of high-performance computing facilities. This  
443 work is supported by the Ministry of Science and Technology of Taiwan  
444 (105-2311-B-002-040-MY2 and 107-2636-B-002-004 to CRL).

445

446 **Author contributions**

447 Designed the study: CRL. Analyzed data: CWH, CRL, CYL. Wrote the paper: CRL, CWH.

448

449 **Conflict of interest statement**

450 The authors declare no conflict of interest

451

452 **Data Accessibility**

453 All data were downloaded from public database.

454

455

456 References

457

- 458 1. 1,135 Genomes Reveal the Global Pattern of Polymorphism in *Arabidopsis thaliana*.  
459 *Cell* 166, 481–491 (2016).
- 460 2. Lee, C.-R. *et al.* On the post-glacial spread of human commensal *Arabidopsis thaliana*.  
461 *Nat. Commun.* 8, 14458 (2017).
- 462 3. Exposito-Alonso, M. *et al.* The rate and potential relevance of new mutations in a  
463 colonizing plant lineage. *PLoS Genet.* 14, e1007155 (2018).
- 464 4. Fransz, P. *et al.* Molecular, genetic and evolutionary analysis of a paracentric  
465 inversion in *Arabidopsis thaliana*. *Plant J.* 88, 159–178 (2016).
- 466 5. Durvasula, A. *et al.* African genomes illuminate the early history and transition to  
467 selfing in *Arabidopsis thaliana*. *Proc. Natl. Acad. Sci. U.S.A.* 114, 5213–5218 (2017).
- 468 6. Fulgione, A. & Hancock, A. M. Archaic lineages broaden our view on the history of  
469 *Arabidopsis thaliana*. *New Phytol.* 21, 1877 (2018).
- 470 7. Novikova, P. Y. *et al.* Sequencing of the genus *Arabidopsis* identifies a complex history  
471 of nonbifurcating speciation and abundant trans-specific polymorphism. *Nat. Genet.*  
472 48, 1077–1082 (2016).
- 473 8. Zou, Y.-P. *et al.* Adaptation of *Arabidopsis thaliana* to the Yangtze River basin.  
474 *Genome Biol.* 18, 239 (2017).
- 475 9. Slon, V. *et al.* The genome of the offspring of a Neanderthal mother and a Denisovan  
476 father. *Nature* 531, 504 (2018).
- 477 10. Alexander, D. H., Novembre, J. & Lange, K. Fast model-based estimation of ancestry in  
478 unrelated individuals. *Genome Res.* 19, 1655–1664 (2009).
- 479 11. Hohmann, N., Wolf, E. M., Lysak, M. A. & Koch, M. A. A Time-Calibrated Road Map of  
480 Brassicaceae Species Radiation and Evolutionary History. *Plant Cell* 27, 2770–2784  
481 (2015).
- 482 12. Bouckaert, R. *et al.* BEAST 2: a software platform for Bayesian evolutionary analysis.  
483 *PLoS Comput Biol* 10, e1003537 (2014).
- 484 13. Heled, J. & Drummond, A. J. Bayesian inference of population size history from  
485 multiple loci. *BMC Evol. Biol.* 8, 289 (2008).
- 486 14. François, O., Blum, M. G. B., Jakobsson, M. & Rosenberg, N. A. Demographic history of  
487 european populations of *Arabidopsis thaliana*. *PLoS Genet.* 4, e1000075 (2008).
- 488 15. Schiffels, S. & Durbin, R. Inferring human population size and separation history from  
489 multiple genome sequences. *Nat. Genet.* 46, 919–925 (2014).
- 490 16. Long, Q. *et al.* Massive genomic variation and strong selection in *Arabidopsis thaliana*

- 491 lines from Sweden. *Nat. Genet.* 45, 884–890 (2013).
- 492 17. Martin, S. H., Davey, J. W. & Jiggins, C. D. Evaluating the use of ABBA-BABA statistics  
493 to locate introgressed loci. *Mol Biol Evol* 32, 244–257 (2015).
- 494 18. Exposito-Alonso, M. *et al.* Genomic basis and evolutionary potential for extreme  
495 drought adaptation in *Arabidopsis thaliana*. *Nat Ecol Evol* 2, 352–358 (2018).
- 496 19. Cox, M. P., Peterson, D. A. & Biggs, P. J. SolexaQA: At-a-glance quality assessment of  
497 Illumina second-generation sequencing data. *BMC Bioinformatics* 11, 485 (2010).
- 498 20. Martin, M. Cutadapt removes adapter sequences from high-throughput sequencing  
499 reads. *EMBnet.journal* 17, 10 (2011).
- 500 21. Li, H. & Durbin, R. Fast and accurate short read alignment with Burrows-Wheeler  
501 transform. *Bioinformatics* 25, 1754–1760 (2009).
- 502 22. McKenna, A. *et al.* The Genome Analysis Toolkit: a MapReduce framework for  
503 analyzing next-generation DNA sequencing data. *Genome Res.* 20, 1297–1303 (2010).
- 504 23. McKain, M. R., Hartsock, R. H., Wohl, M. M. & Kellogg, E. A. Verdant: automated  
505 annotation, alignment and phylogenetic analysis of whole chloroplast genomes.  
506 *Bioinformatics* 33, 130–132 (2017).
- 507 24. Edgar, R. C. MUSCLE: multiple sequence alignment with high accuracy and high  
508 throughput. *Nucleic Acids Res.* 32, 1792–1797 (2004).
- 509 25. Danecek, P. *et al.* The variant call format and VCFtools. *Bioinformatics* 27, 2156–2158  
510 (2011).
- 511 26. Bradbury, P. J. *et al.* TASSEL: software for association mapping of complex traits in  
512 diverse samples. *Bioinformatics* 23, 2633–2635 (2007).
- 513 27. Jombart, T. adegenet: a R package for the multivariate analysis of genetic markers.  
514 *Bioinformatics* 24, 1403–1405 (2008).
- 515 28. Wickham, H. ggplot2. *Wiley Interdisciplinary Reviews: Computational Statistics* 3,  
516 180–185 (2011).
- 517 29. Nei, M. Genetic Distance between Populations. *The American Naturalist* 106, 283–  
518 292 (1972).
- 519 30. Guindon, S. *et al.* New Algorithms and Methods to Estimate Maximum-Likelihood  
520 Phylogenies: Assessing the Performance of PhyML 3.0. *Systematic Biology* 59, 307–  
521 321 (2010).
- 522 31. Lefort, V., Longueville, J.-E. & Gascuel, O. SMS: Smart Model Selection in PhyML. *Mol*  
523 *Biol Evol* 34, 2422–2424 (2017).
- 524 32. Stöver, B. C. & Müller, K. F. TreeGraph 2: combining and visualizing evidence from  
525 different phylogenetic analyses. *BMC Bioinformatics* 11, 7 (2010).



- 526 33. Paradis, E., Claude, J. & Strimmer, K. APE: Analyses of Phylogenetics and Evolution in  
527 R language. *Bioinformatics* 20, 289–290 (2004).
- 528 34. Tian, T. *et al.* agriGO v2.0: a GO analysis toolkit for the agricultural community, 2017  
529 update. *Nucleic Acids Res.* 45, W122–W129 (2017).
- 530
- 531

532 **Figure legend**

533

534 Fig. 1. Differentiation of *Arabidopsis thaliana* nuclear genomes. (a) Neighbor-Joining tree. (b)  
535 K=2 ADMIXTURE result.

536

537 Fig. 2. Differentiation of *Arabidopsis thaliana* chloroplast genomes. (a) Principal component  
538 analysis. (b) Maximum likelihood cladogram, where branches with low aLRT support were  
539 collapsed. Group 6 (East) consists of samples from Yangtze River Basin, China and Kashmir,  
540 India. Group 6 (West) consists of samples in Eurasia.

541

542 Fig. 3. Geographical distribution and spatial genetic variation of chloroplast haplogroups. (a)  
543 Diversity map of chloroplast haplogroups. Pie charts show the proportion of each group, and  
544 chart size is proportional to sample size. (b), (c), (d), (e) are polymorphism maps correspond  
545 to group 2, 3, 4, 5+6+7 respectively. The diameter of each circle is proportional to mean  
546 pair-wise genetic distance of each geographical region.

547

548 Fig. 4. Variation of population size over time inferred from chloroplast polymorphism.  
549 Extended Bayesian Skyline is plotted for each chloroplast haplogroup except group 10, which  
550 has small sample size.

551

552 Fig. 5. Timing of population splits inferred from chromosome 1 translocation. Relative cross  
553 coalescence rate (CCR) between populations is shown. EU: Western Europe, CA: Central Asia,  
554 YA: Yangtze, TZ: Tanzania, TZSA: Tanzania and South Africa. Decrease of CCR from 1.0  
555 indicates population split, steep slope of CCR from 1.0 to 0.0 indicates drastic and complete  
556 isolation while mild one indicates slow and progressive isolation. (a) 4 haplotypes MSMC  
557 that has better estimation of older splits. (b) 8 haplotypes MSMC that has better estimation  
558 of more recent splits.

559

560 Fig. 6. Two scenarios of demographic history consistent with the present-day pattern of  
561 spatial genetic variation in *Arabidopsis thaliana*. Scenario 1 represents the “Out of Africa”  
562 model: Ancestral population of *Arabidopsis thaliana* in Africa split into 3 populations at ca.  
563 90 kya, the Moroccan, Levantine and Sub-saharan African. Later, Moroccan expanded into  
564 Europe through Iberia, Levantine dispersed into Central Asia and Europe while Sub-saharan  
565 African migrated into Yunnan possibly through Southwest and South Asia. Scenario 2  
566 represents the “Into Africa” model: Ancestral population of *Arabidopsis thaliana* in Europe

567 split into 3 populations, the Moroccan/Iberian, Levantine and a South/Southwest Asian  
568 population. Later, Moroccan/Iberian expanded northwards and eastwards into Europe,  
569 Levantine dispersed into Central Asia and Europe while the South/Southwest Asian migrated  
570 into Yunnan and Sub-Saharan Africa. Since 10 kya, the weedy non-relicts from Balkan and  
571 Eastern Europe spread rapidly westwards into Iberia and eastwards into Yangtze River Basin  
572 of China, wiping out genetic variation along the way while obtaining adaptive genes through  
573 gene flow between local relicts.

574

575 Supplementary Fig. 1. Geographical distribution of nuclear genetic variation in *Arabidopsis*  
576 *thaliana*. The color of dots corresponds to the Neighbor-Joining tree in Figure 1a.

577

578 Supplementary Fig. 2. Distribution of nuclear genome heterozygosity of 1322 *Arabidopsis*  
579 *thaliana* accessions.

580

581 Supplementary Fig. 3. Differentiation of *Arabidopsis thaliana* chloroplast genomes. (a) PC3  
582 and PC4. (b) PC5 and PC6. Group 6 (East) consists of samples from Yangtze River Basin, China  
583 and Kashmir, India. Group 6 (West) consists of samples in Eurasia.

584

585 Supplementary Fig. 4. Chloroplast uncollapsed maximum likelihood phylogram. Group 6  
586 (East) consists of samples from Yangtze River Basin, China and Kashmir, India. Group 6 (West)  
587 consists of samples in Eurasia. Note that this is an uncollapsed bifurcating tree. Some  
588 internal branches are too short to be clearly visible. These branches also tend to have  
589 extremely low branch support.

590

591 Supplementary Fig. 5. Chloroplast uncollapsed maximum likelihood cladogram with aLRT  
592 branch support. Branches were colored according to chloroplast haplogroups defined in  
593 Figure 2.

594

595 Supplementary Fig. 6. Chloroplast BEAST dated tree. Node values represent mean height of  
596 divergence time in mya. Branches were colored according to chloroplast haplogroups  
597 defined previously.

598

599 Supplementary Fig. 7. Chloroplast BEAST dated tree. Node values represent 95% highest  
600 posterior density range of divergence time in mya. Branches were colored according to  
601 chloroplast haplogroups defined previously.

602

603 Supplementary Fig. 8. Spatial genetic variation of chloroplast haplogroups. (a), (b), (c), (d),  
604 (e), (f), (g) are polymorphism maps correspond to group 1, 5, 6, 7, 8, 9, 10 respectively. The  
605 diameter of each circles is proportional to mean pair-wise genetic distance of each  
606 geographical region.

607

608 Supplementary Fig. 9. Variation of population size over time inferred from chloroplast  
609 polymorphism. Extended Bayesian Skyline is plotted for European and Moroccan population  
610 of chloroplast (a) haplogroup 2, (b) haplogroup 3 and (c) haplogroup 7.

611

612 Supplementary Fig. 10. Genetic differentiation of chromosome 1 translocation. (a) Principal  
613 component analysis. (b) Geographical distribution. Red dots are accessions with the  
614 ancestral haplotype, and blue are accessions with the rearranged derived haplotype.

615

616 Supplementary Fig. 11. Reproducing 4-haplotype MSMC results of Durvasula *et al.* (2017)  
617 using chromosome 1 translocation instead of whole genome. Relative cross coalescence rate  
618 (CCR) between populations is shown: EU: West Europe, CA (ancestral): Central Asia  
619 accession with ancestral allele of chromosome 1 translocation, MO: Morocco, TZ: Tanzania,  
620 SA: South Africa. Decrease of CCR from 1.0 indicates population split, steep slope of CCR  
621 from 1.0 to 0.0 indicates drastic and complete isolation while mild one indicates slow and  
622 progressive isolation.

623

624 Supplementary Fig. 12. Nuclear Neighbor-Joining tree built (a) without SNPs located in  
625 regions of top 20%  $\hat{f}_d$ , (b) without SNPs located in regions containing selected genes of  
626 Yangtze population and (c) both.

627

628

629 Table 1. Results from the ABBA-BABA test in the form of ((P1,P2),P3),O) where O is the  
630 outgroup *Arabidopsis lyrata*<sup>a</sup>  
631

| Test | P1   | P2       | P3       | D statistic | Z score | P value   |
|------|------|----------|----------|-------------|---------|-----------|
| A    | TZSA | YU-admix | EU       | 0.172       | 10.330  | 5.17E-25  |
| A    | TZSA | YU-pure  | EU       | 0.011       | 0.614   | 0.539     |
| B    | EU   | YA       | YU-pure  | 0.081       | 3.967   | 7.27E-05  |
| B    | TZSA | YU-pure  | YA       | 0.063       | 3.023   | 0.003     |
| C    | EU   | YA       | YU-admix | 0.256       | 14.562  | 4.92E-48  |
| C    | TZSA | YU-admix | YA       | 0.365       | 21.756  | 6.05E-105 |

632  
633 a. EU: Western European non-relicts. TZSA: Tanzanian and South African relicts. YA: Chinese  
634 Yangtze River Basin non-relicts. YU-admix: The more-admixed Yunnan relict with high  
635 heterozygosity. YU-pure: The less-admixed Yunnan relict.  
636

Fig. 1

a

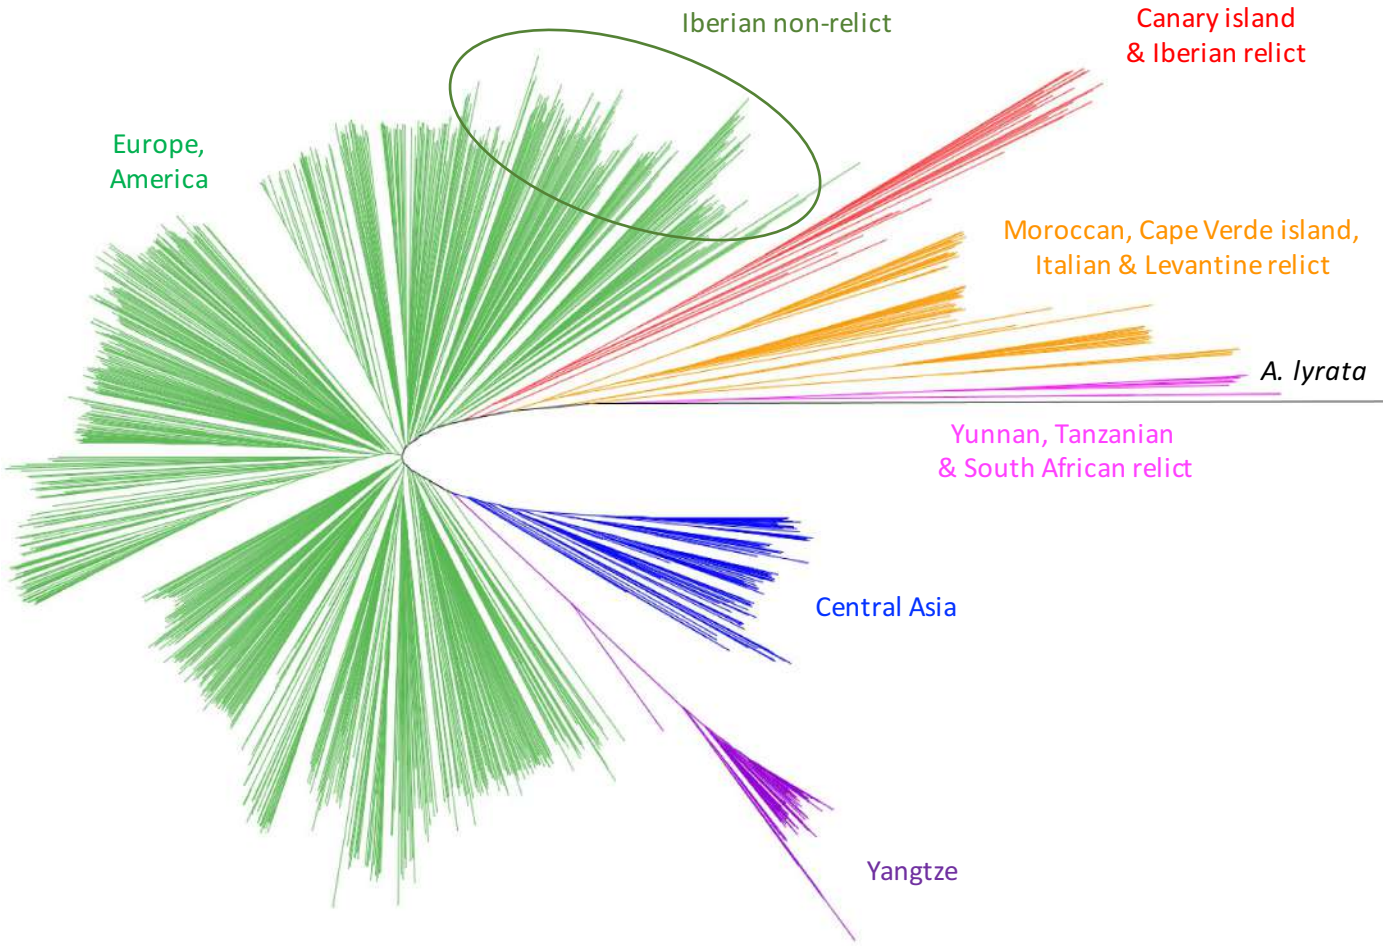

b

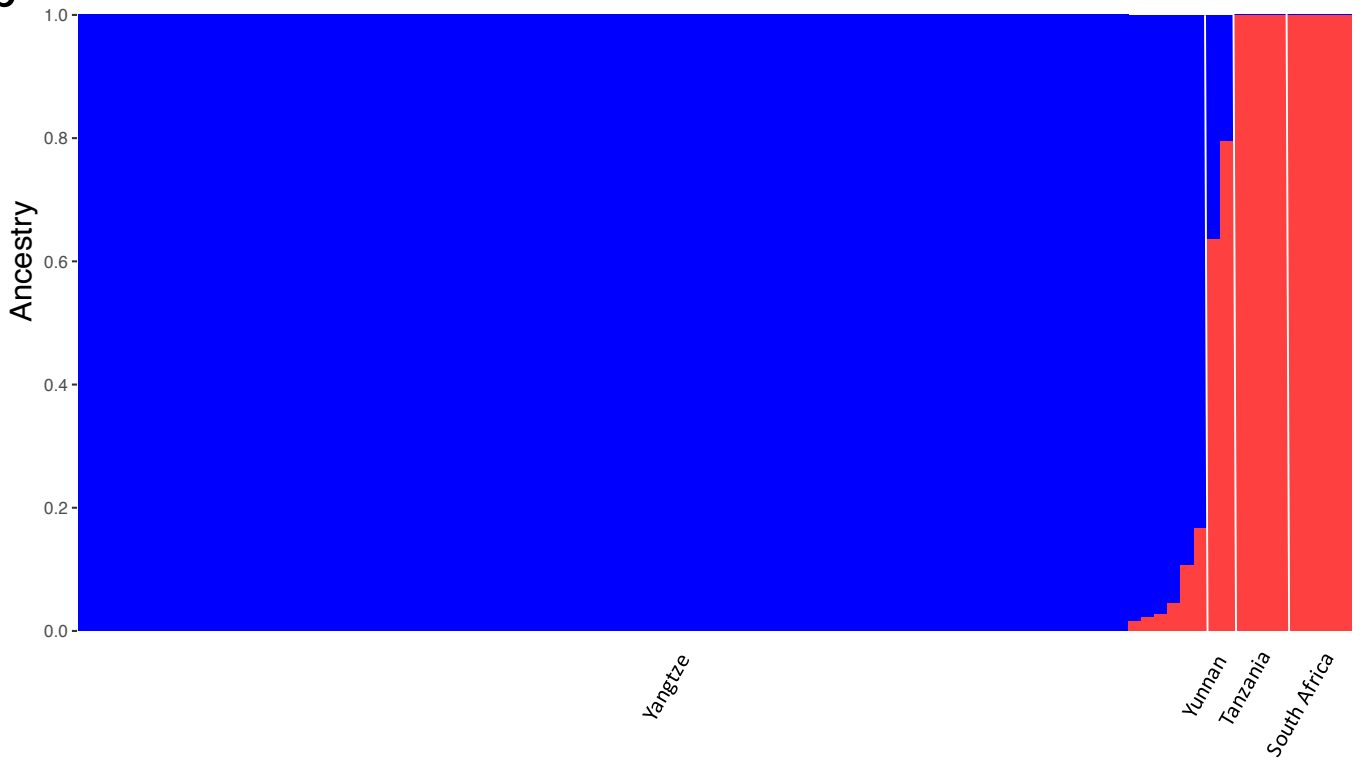

Fig. 2

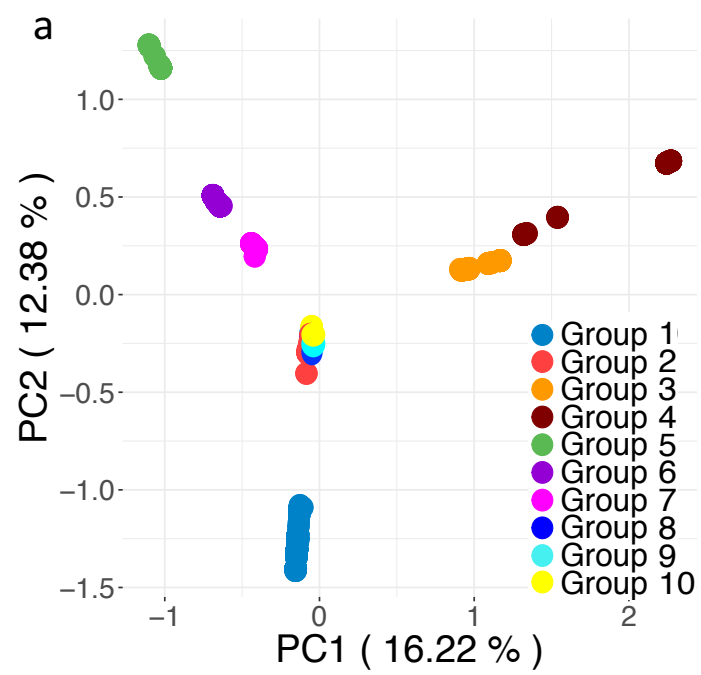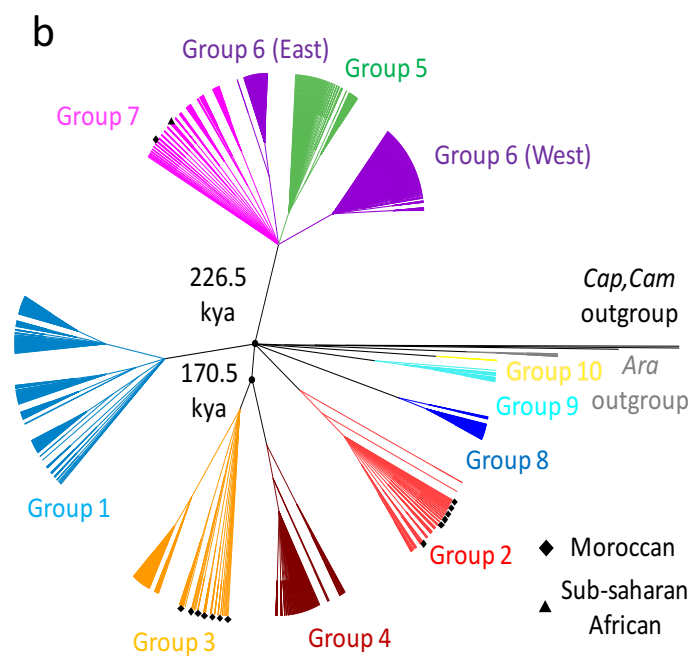

Fig. 3

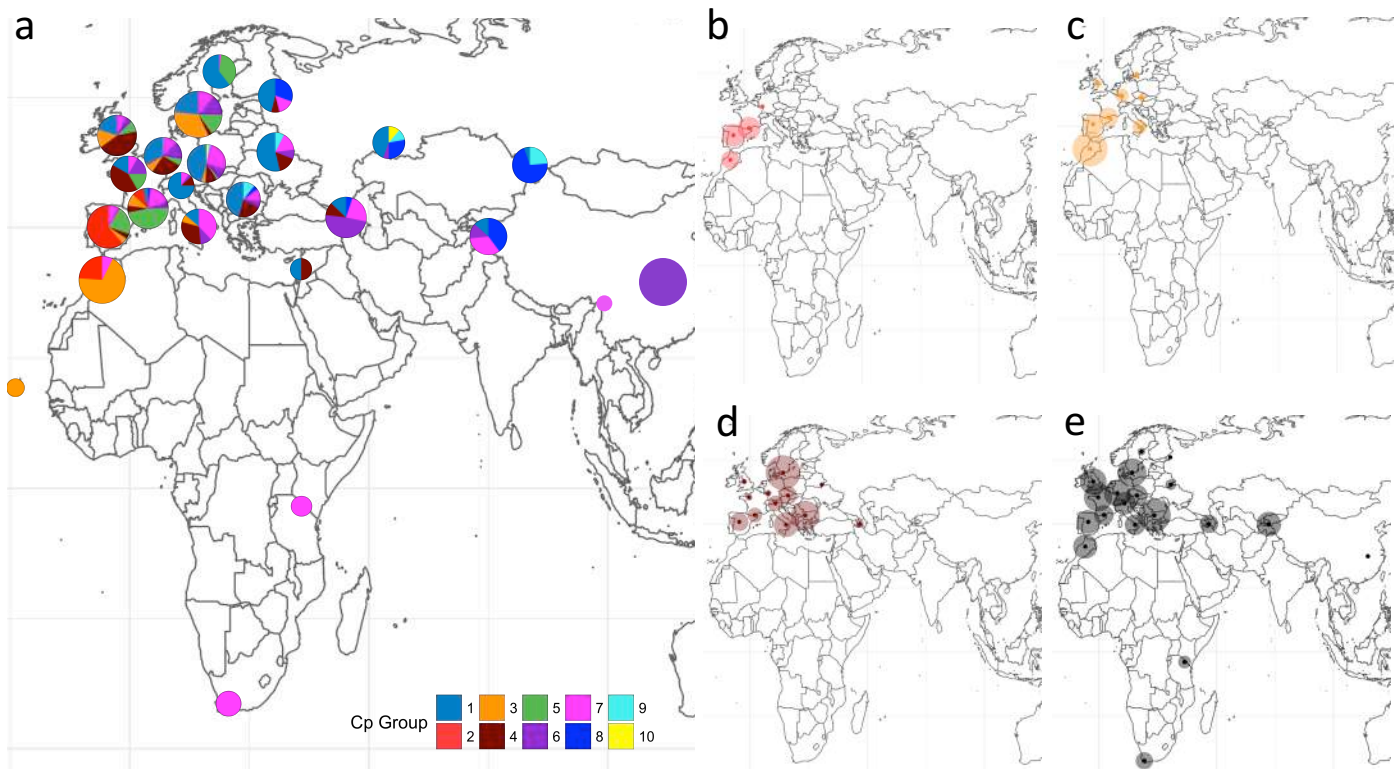





Fig. 5

a

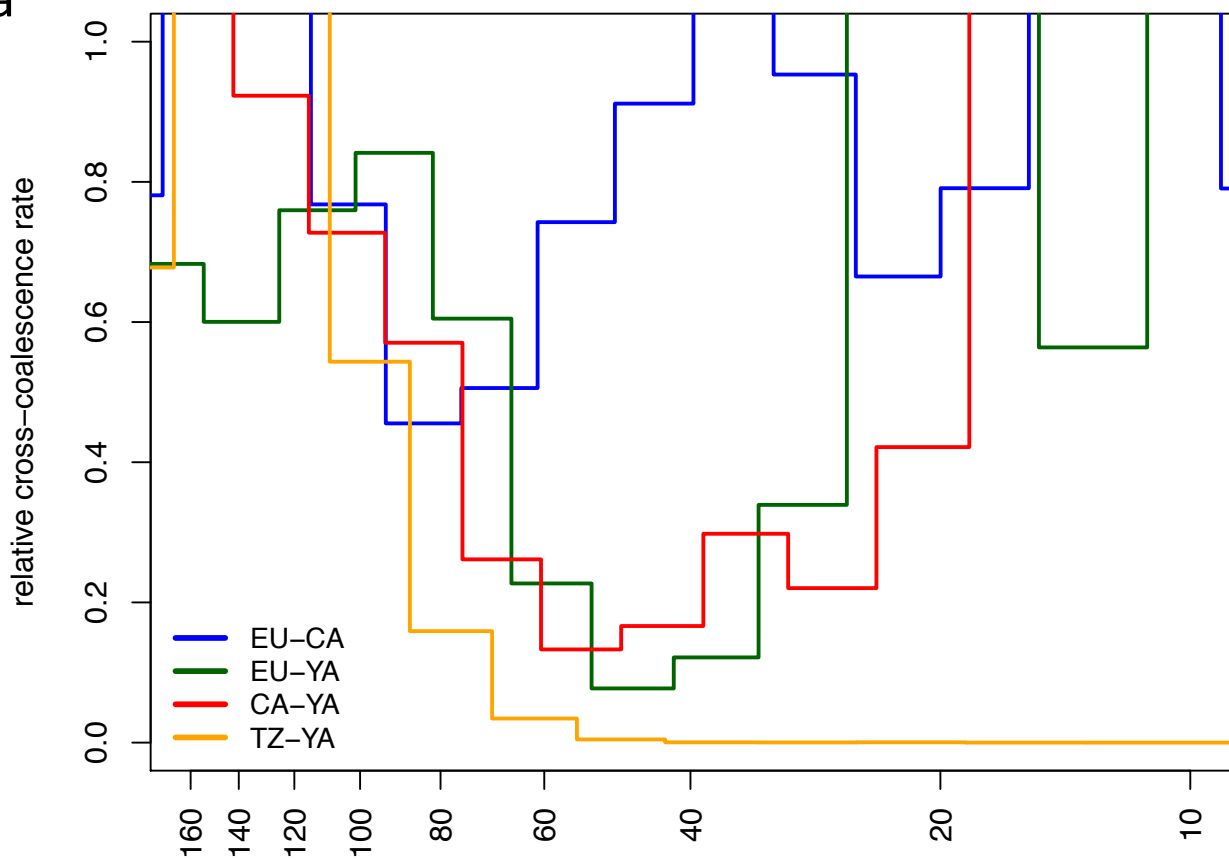

b

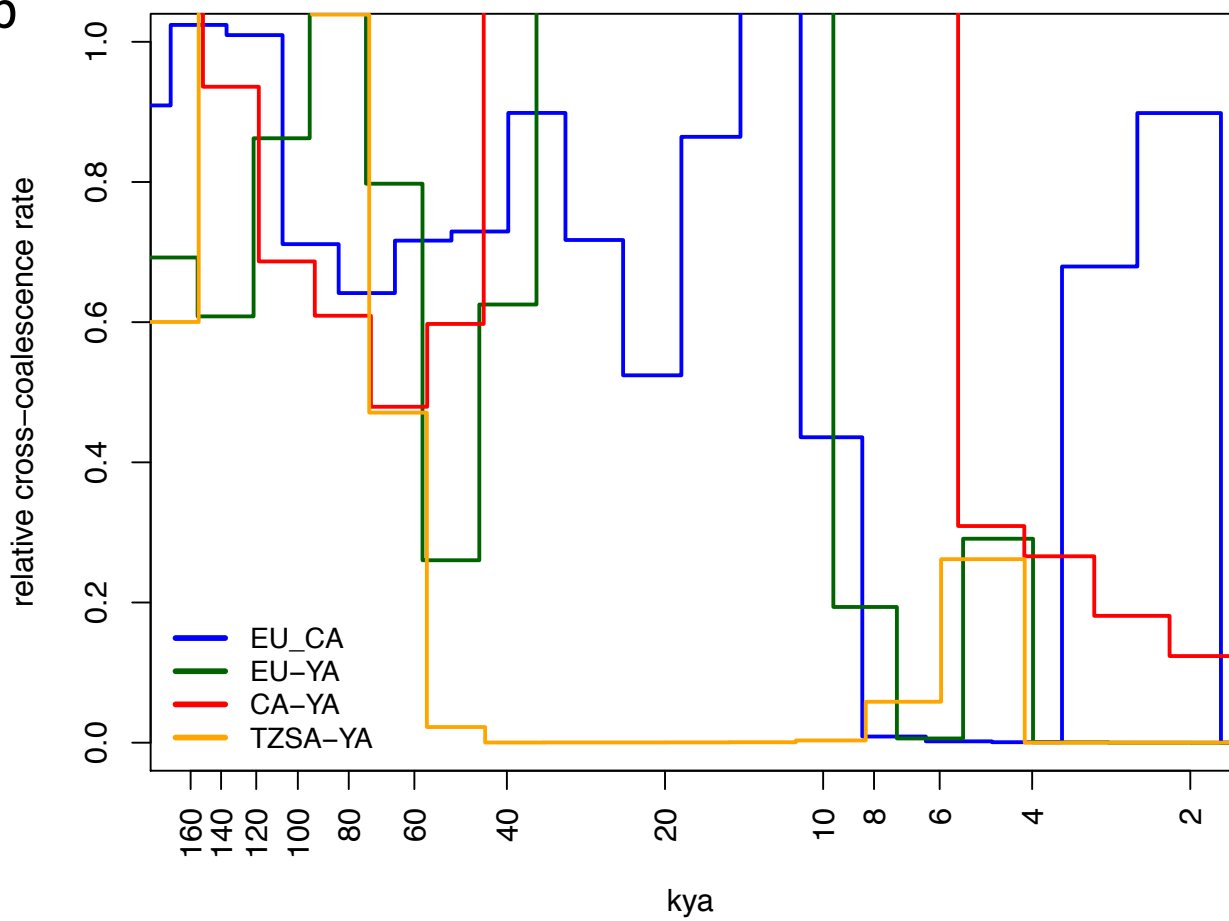

Fig. 6

Scenario 1: Out of Africa

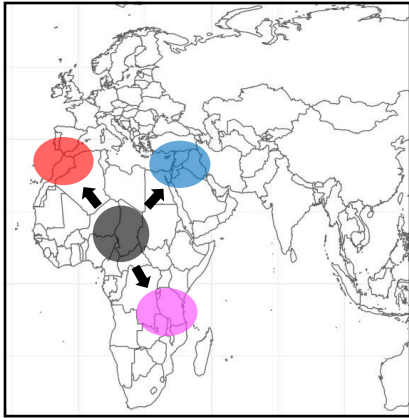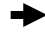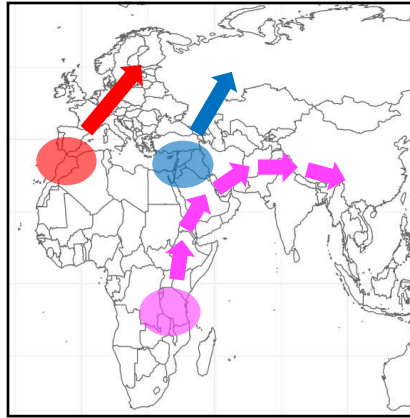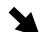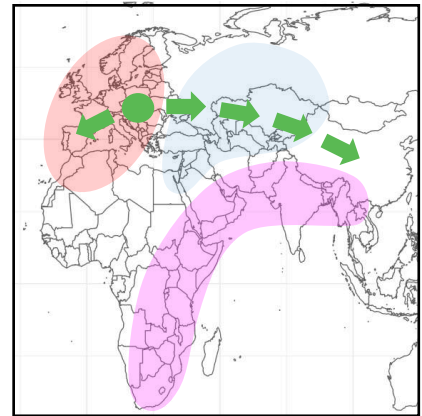

Scenario 2: Into Africa

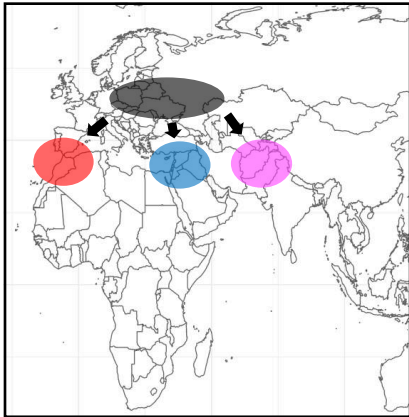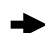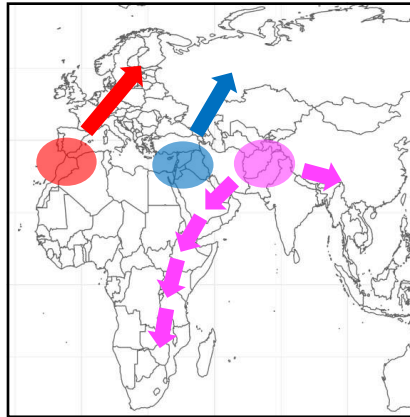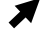

Supplementary Fig. 1

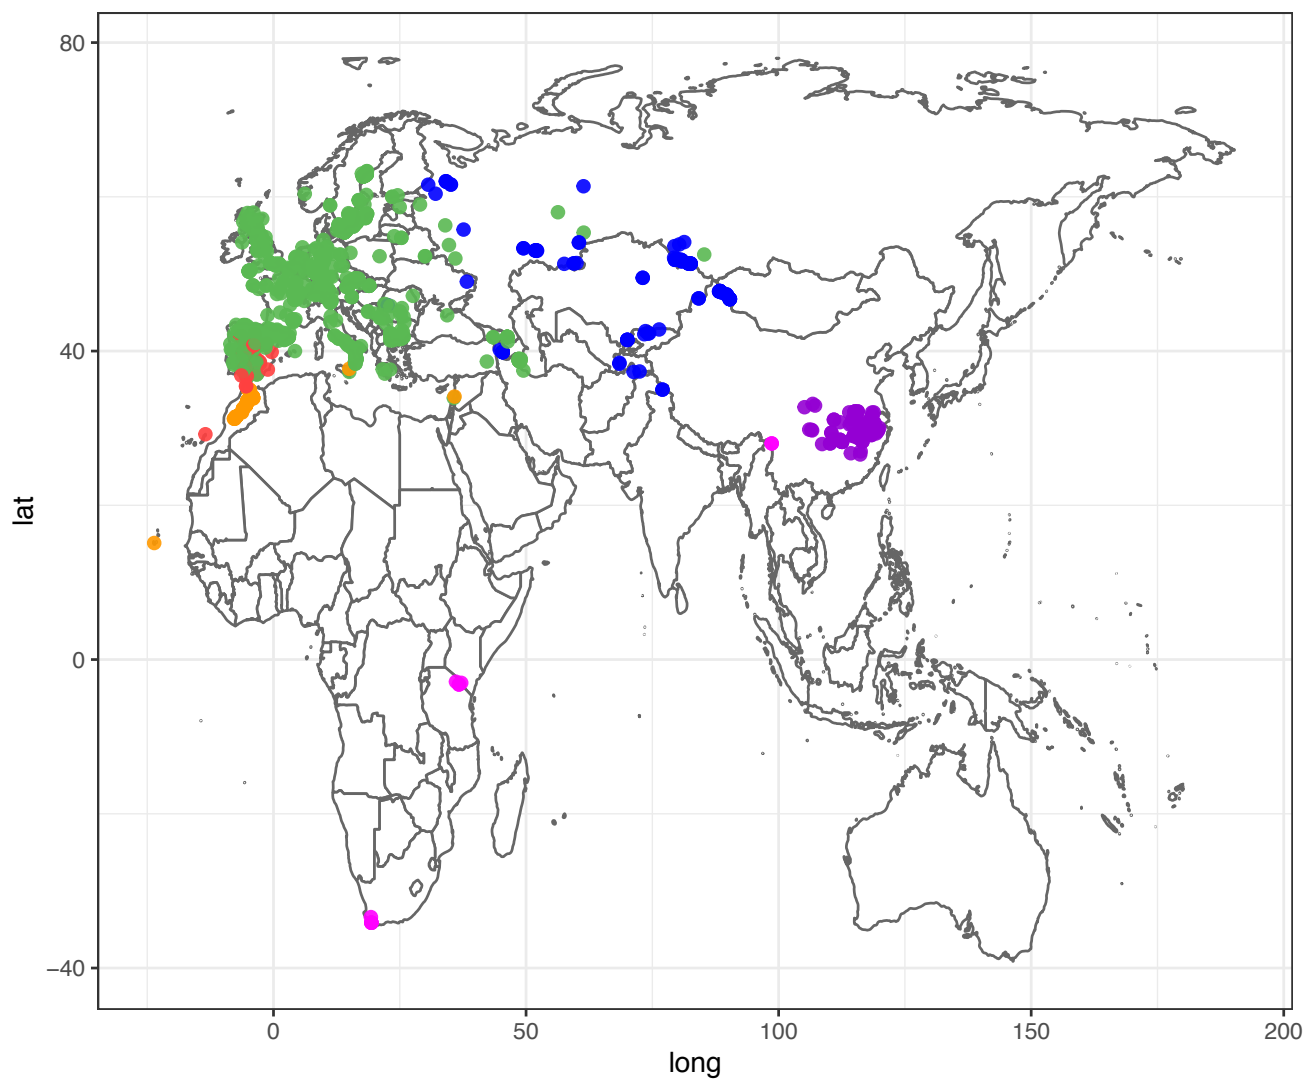

Supplementary Fig. 2

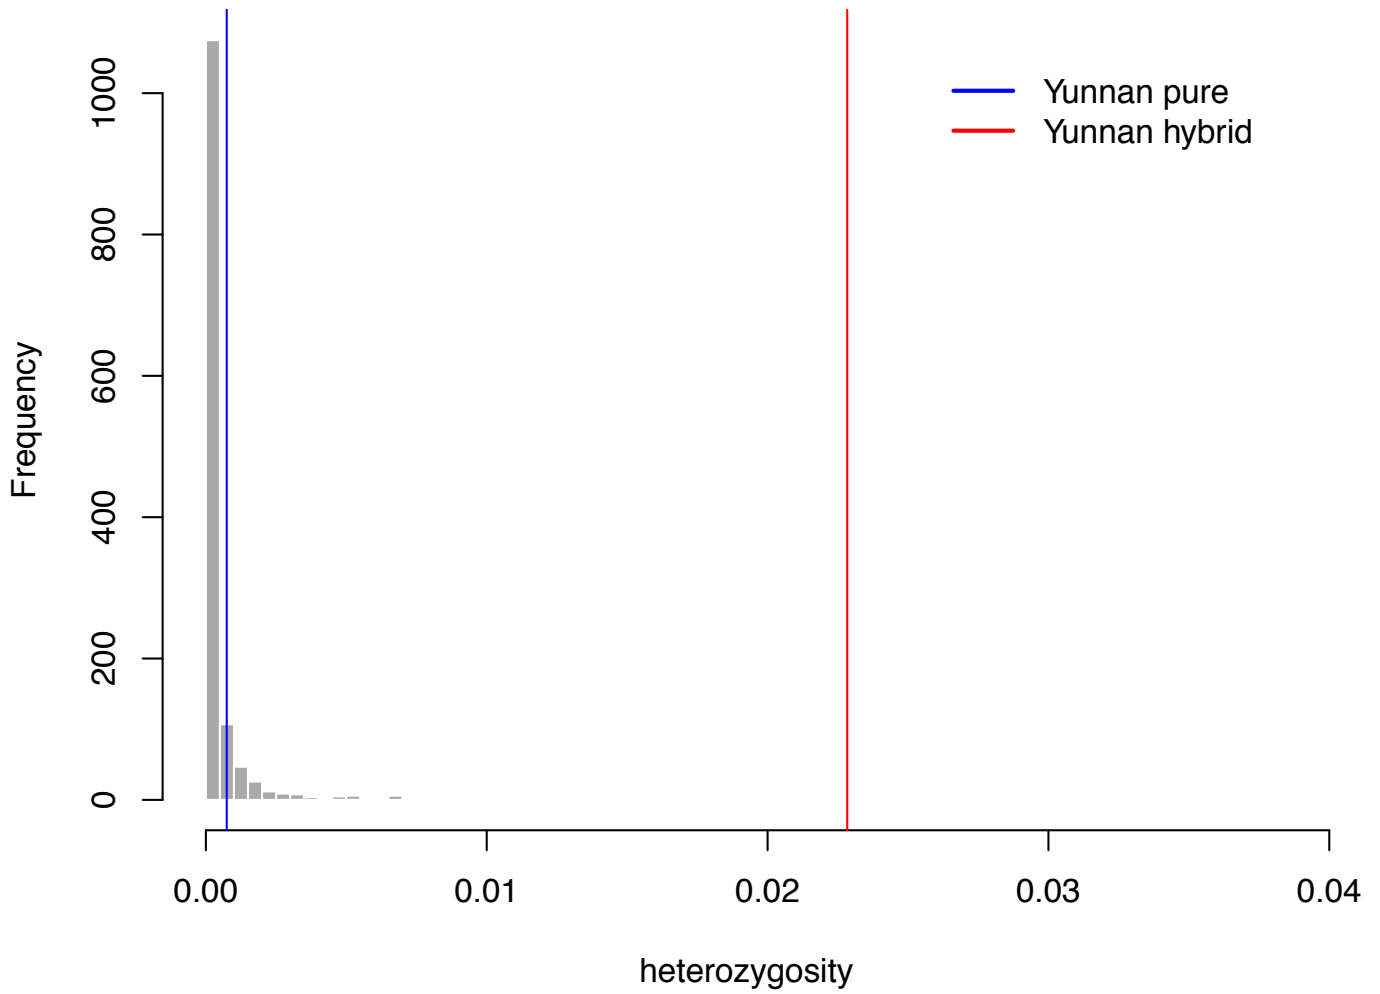

Supplementary Fig. 3

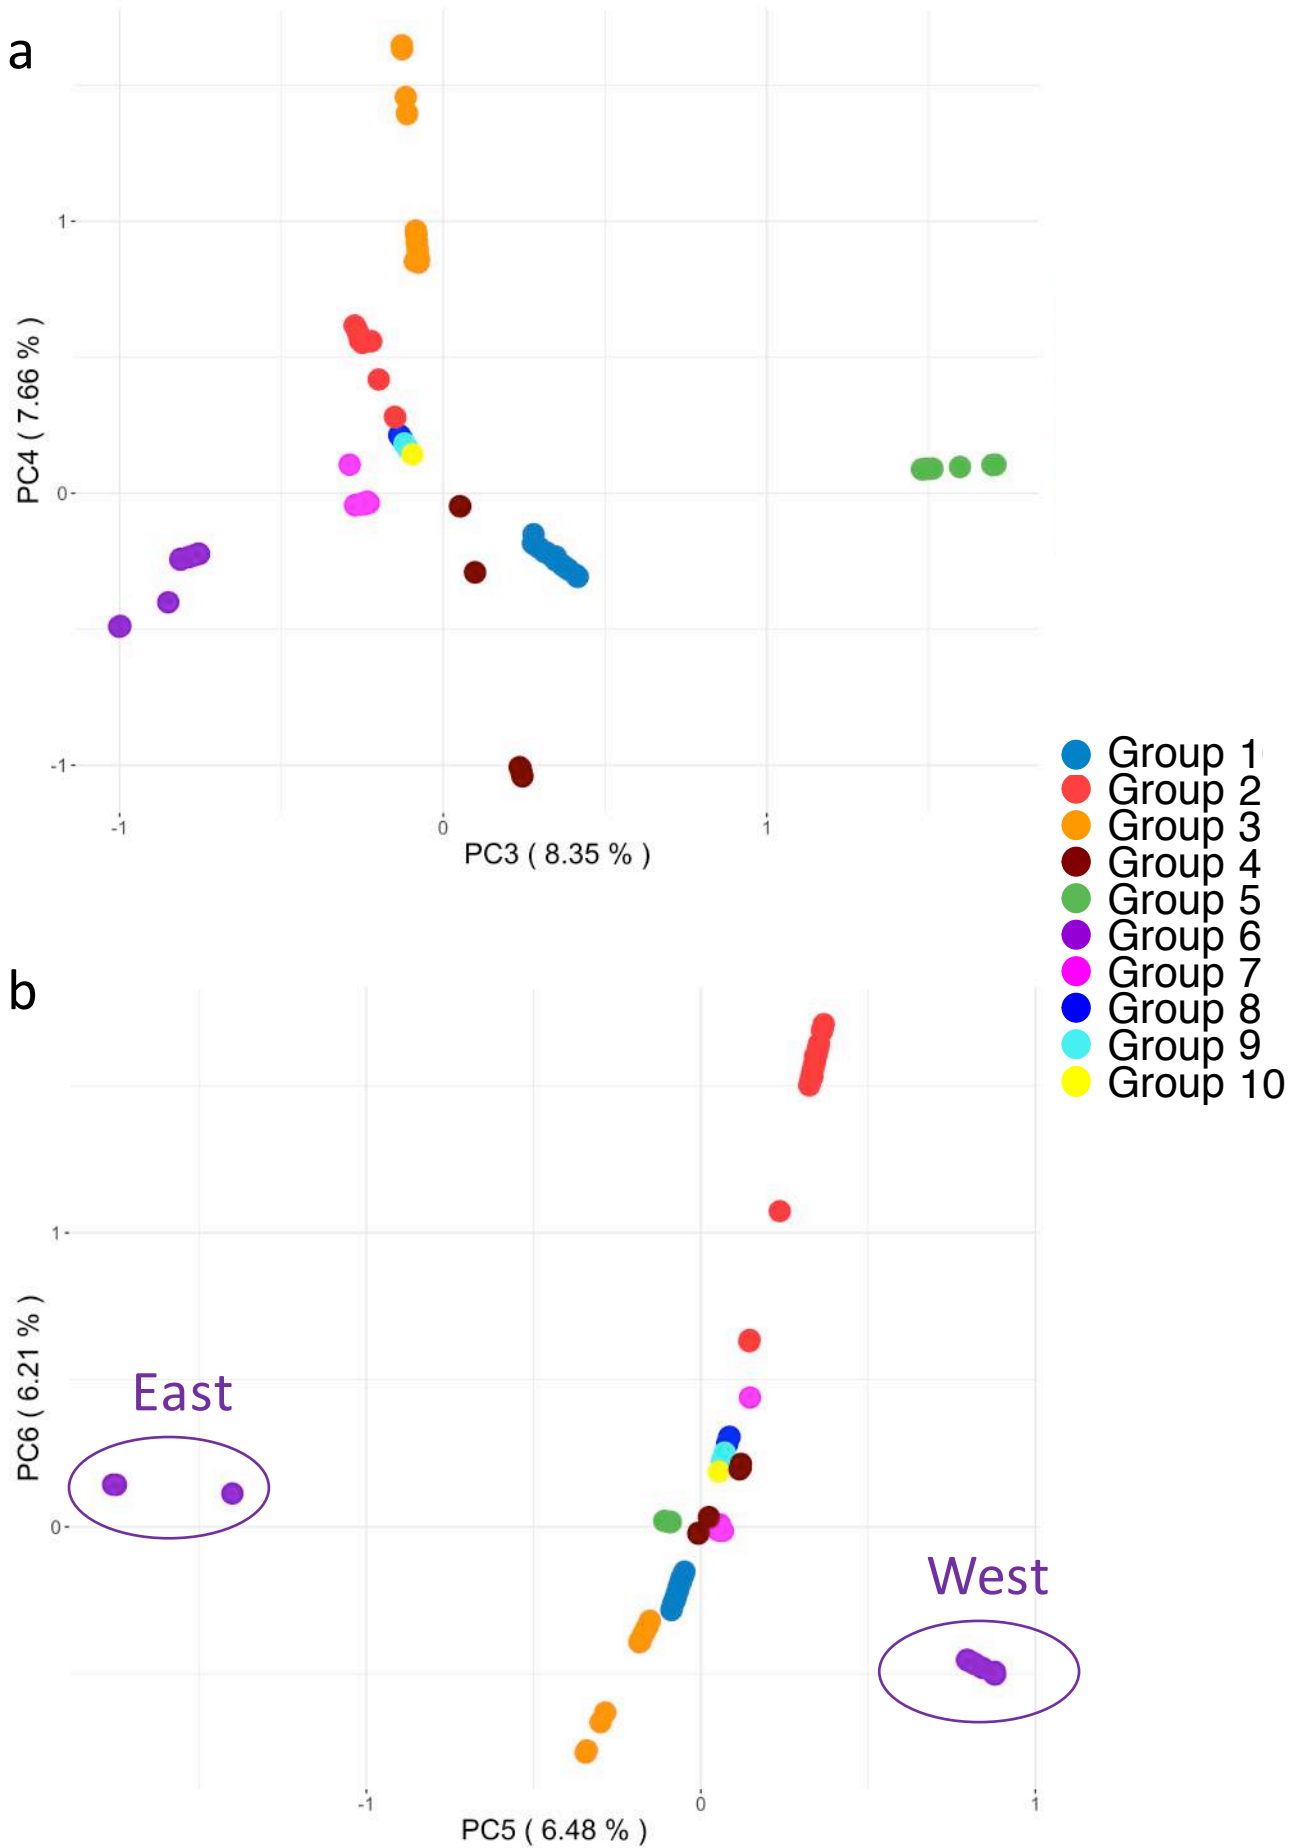

Supplementary Fig. 4

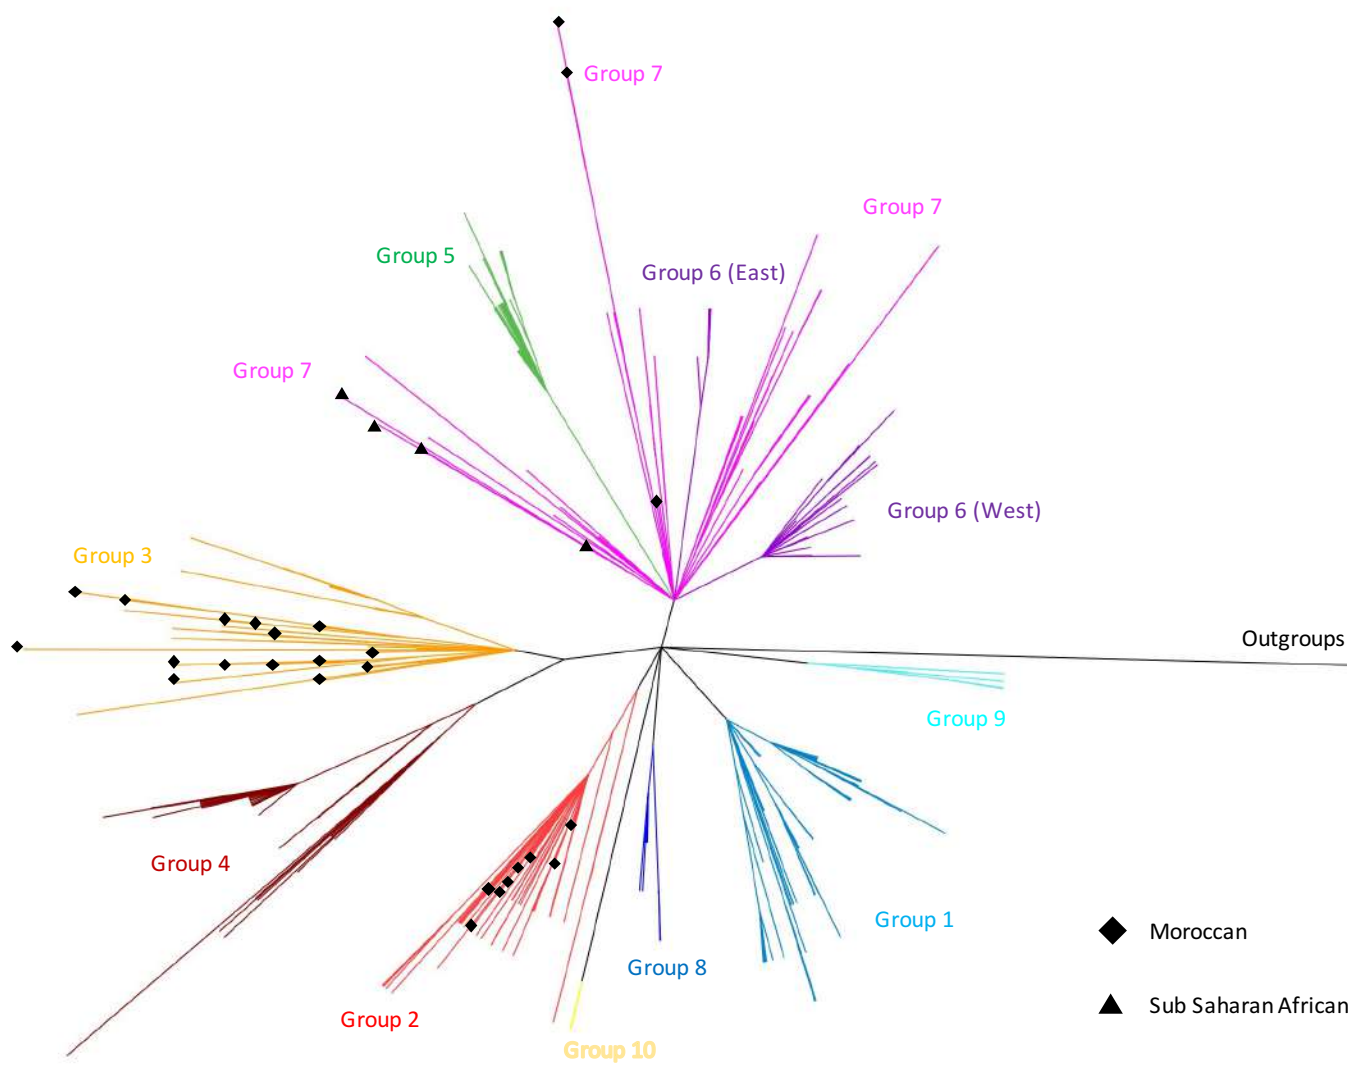

Supplementary Fig. 5

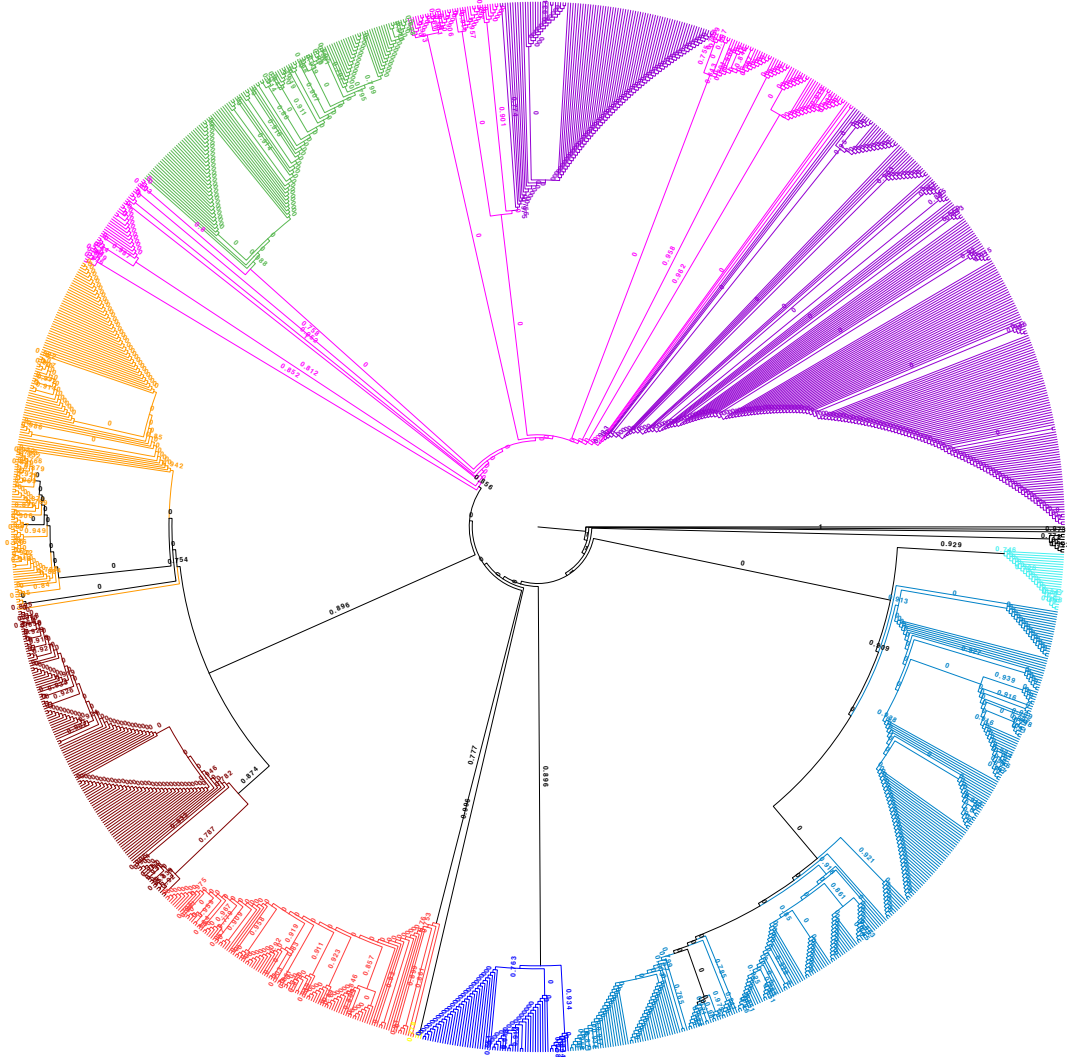



Supplementary Fig. 6

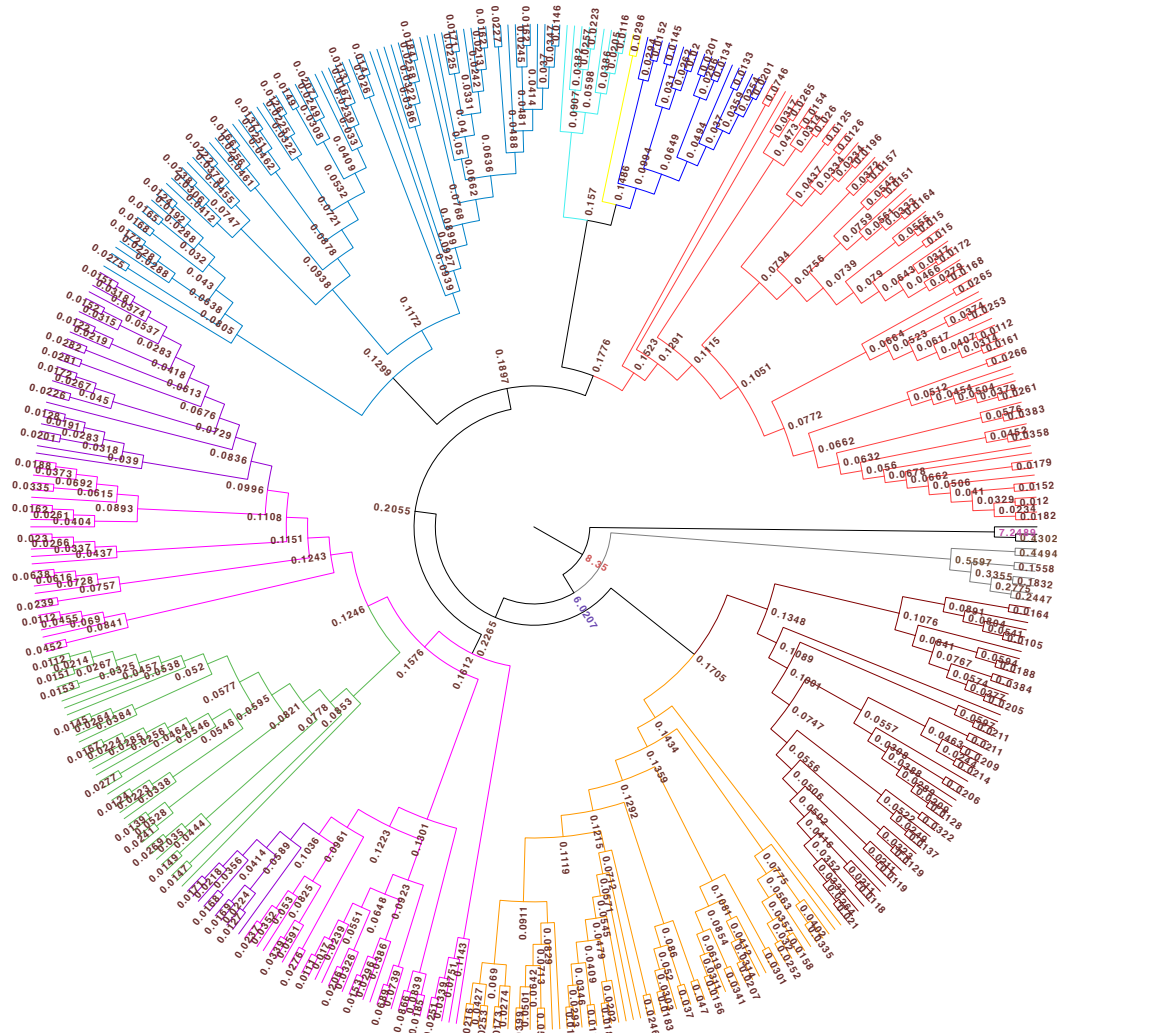

Supplementary Fig. 7

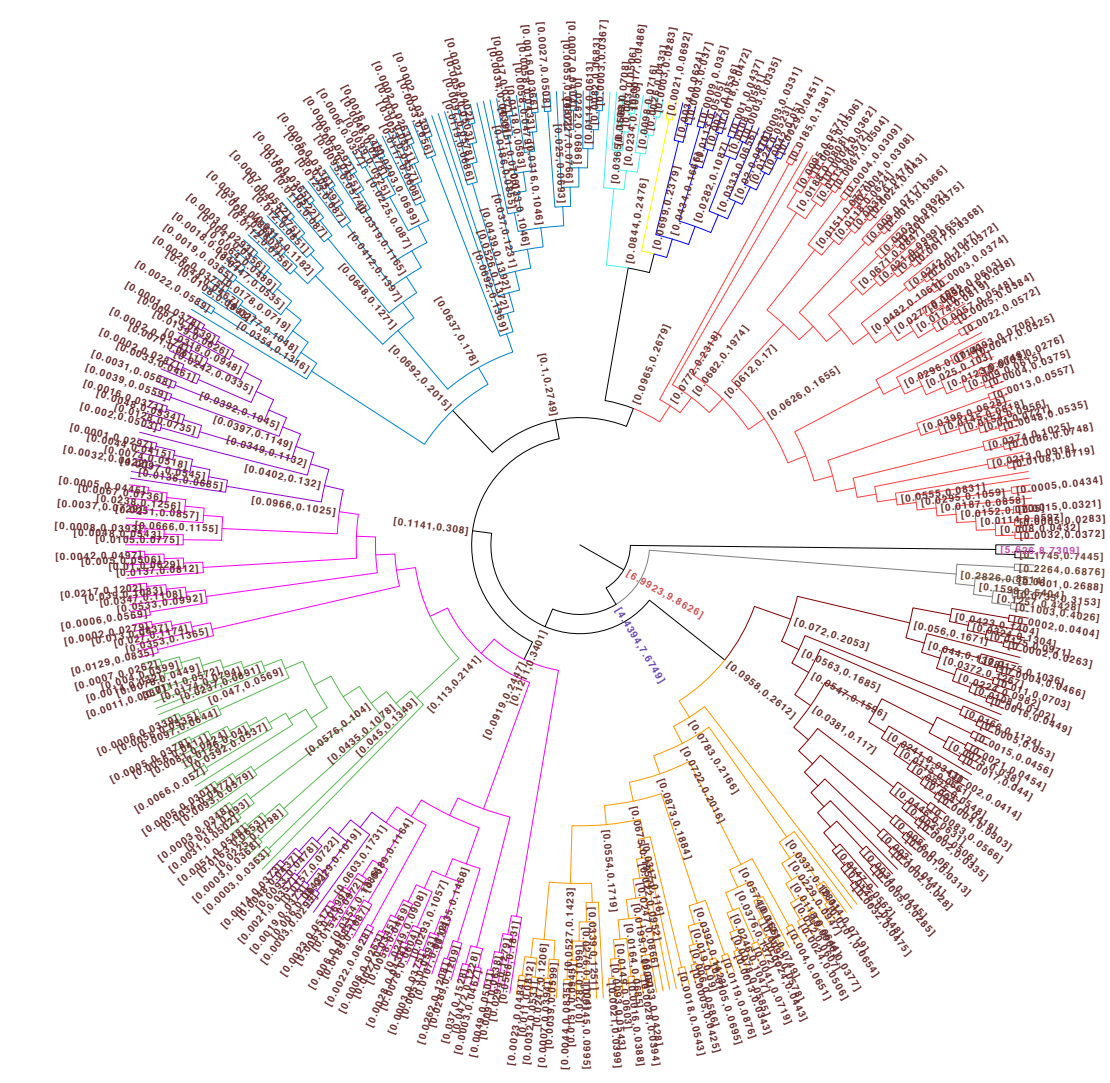

Supplementary Fig. 8

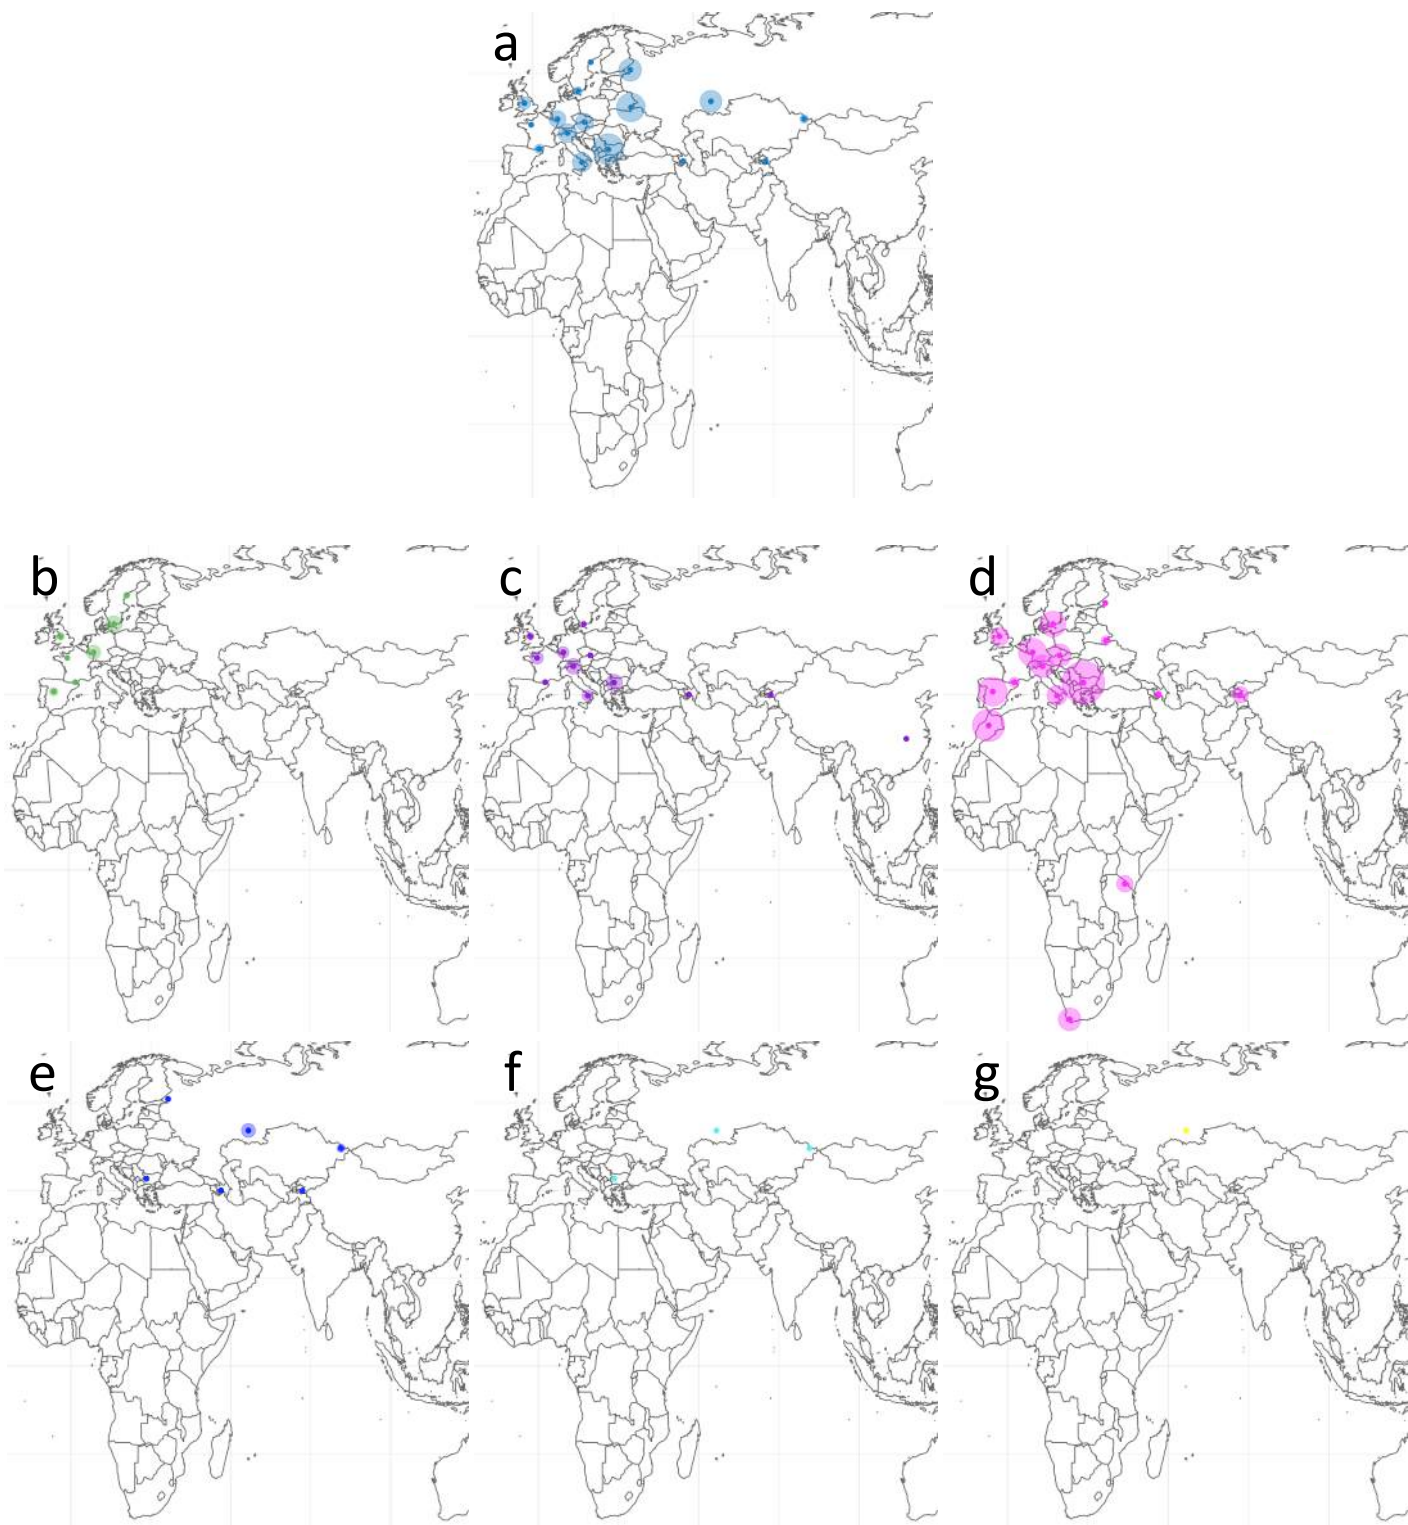

Supplementary Fig. 9

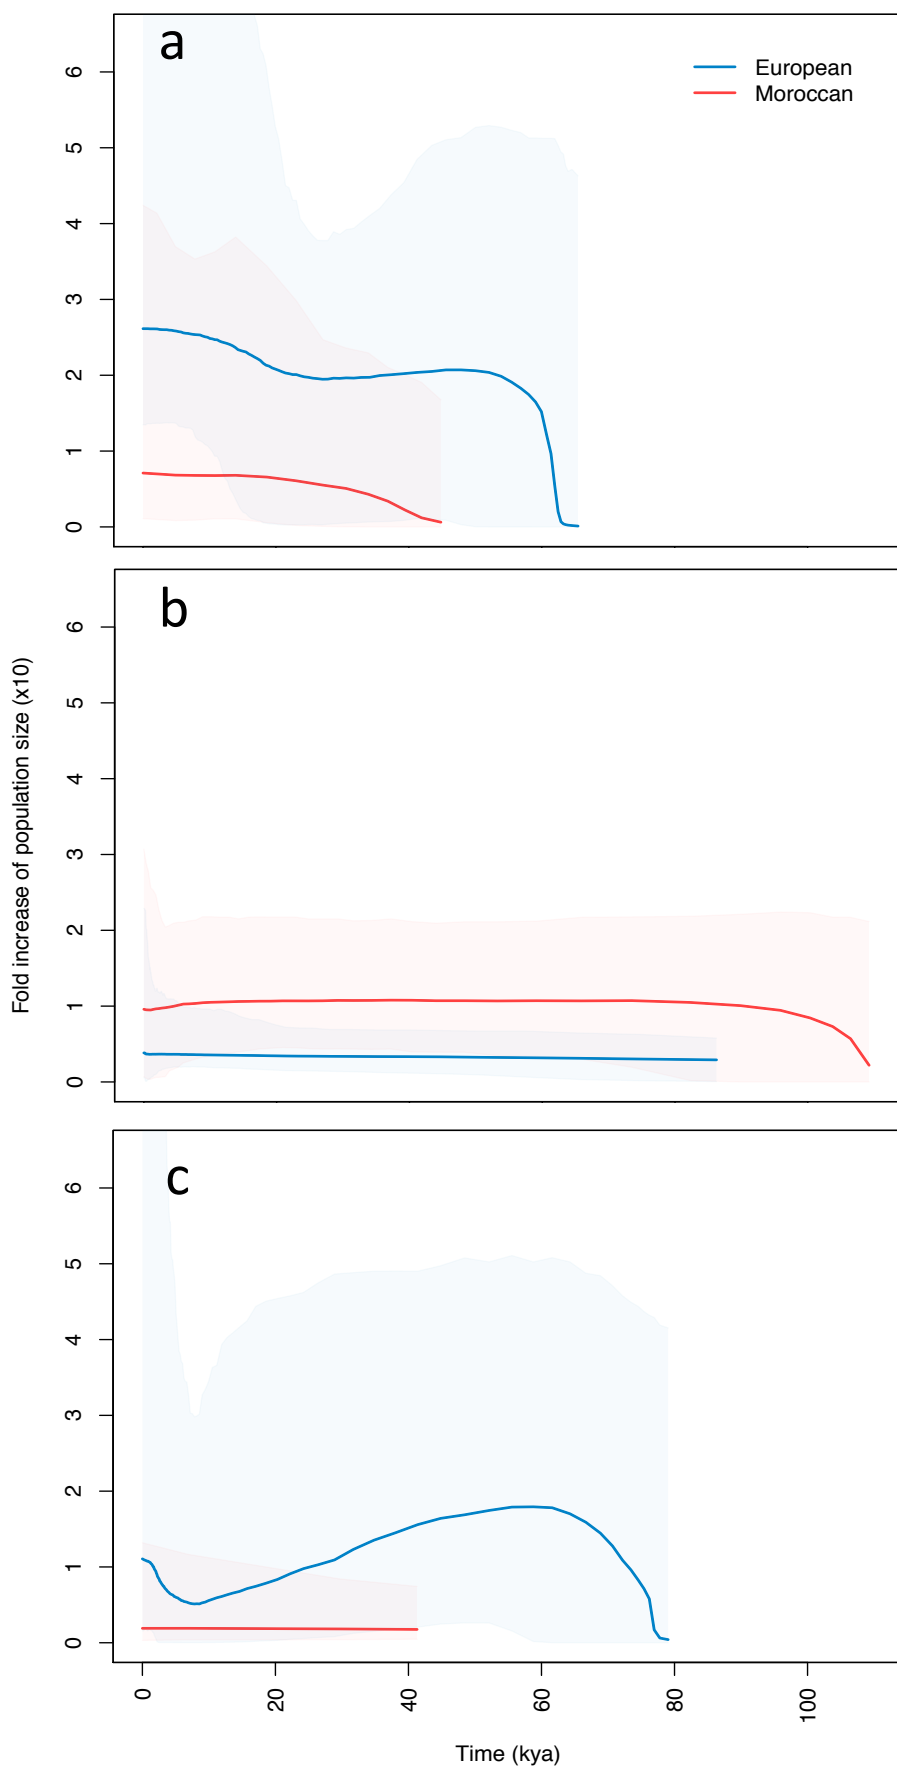

Supplementary Fig. 10

a

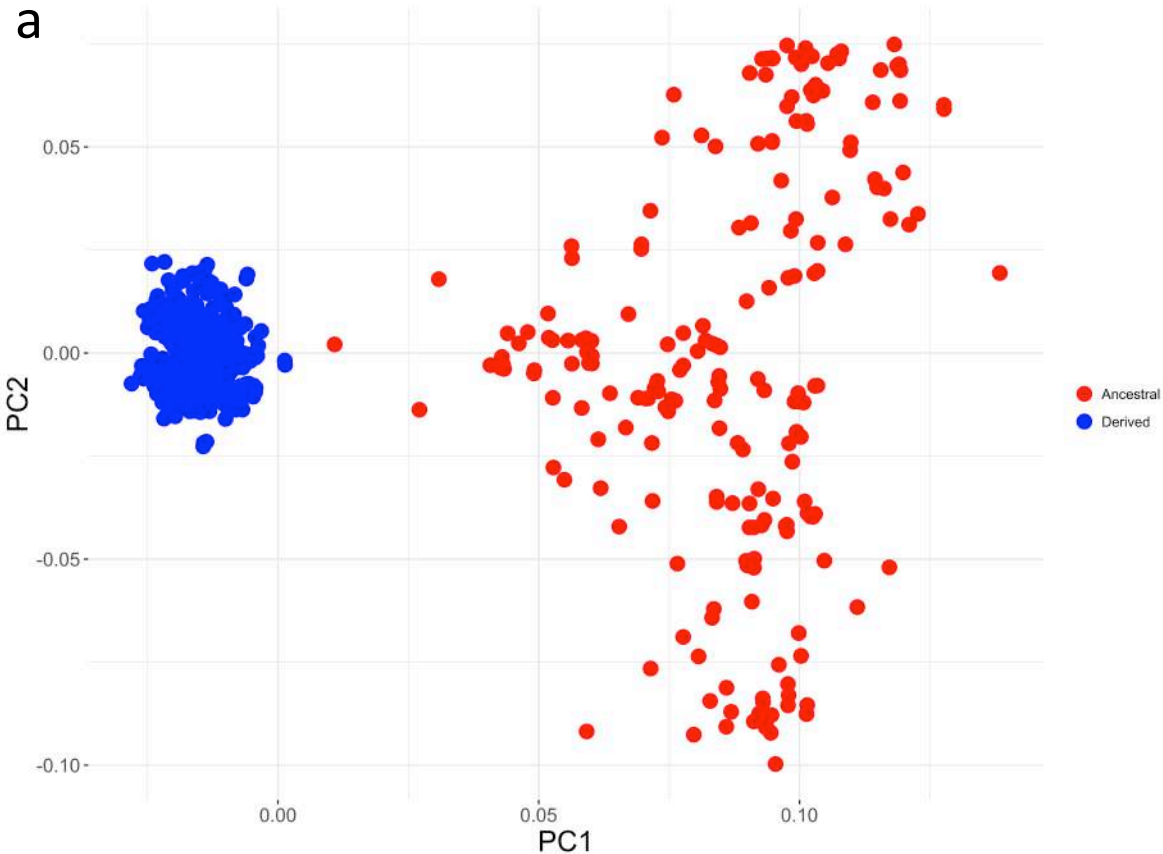

b

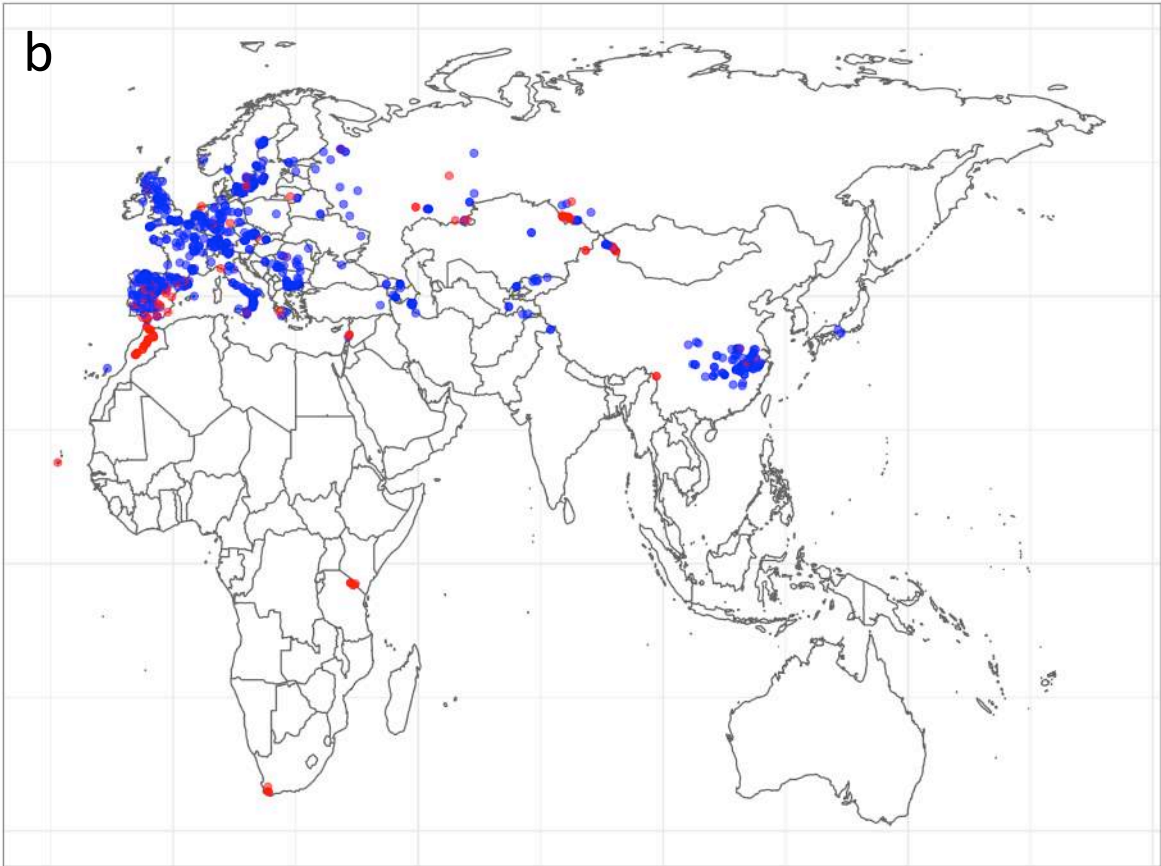

Supplementary Fig. 11

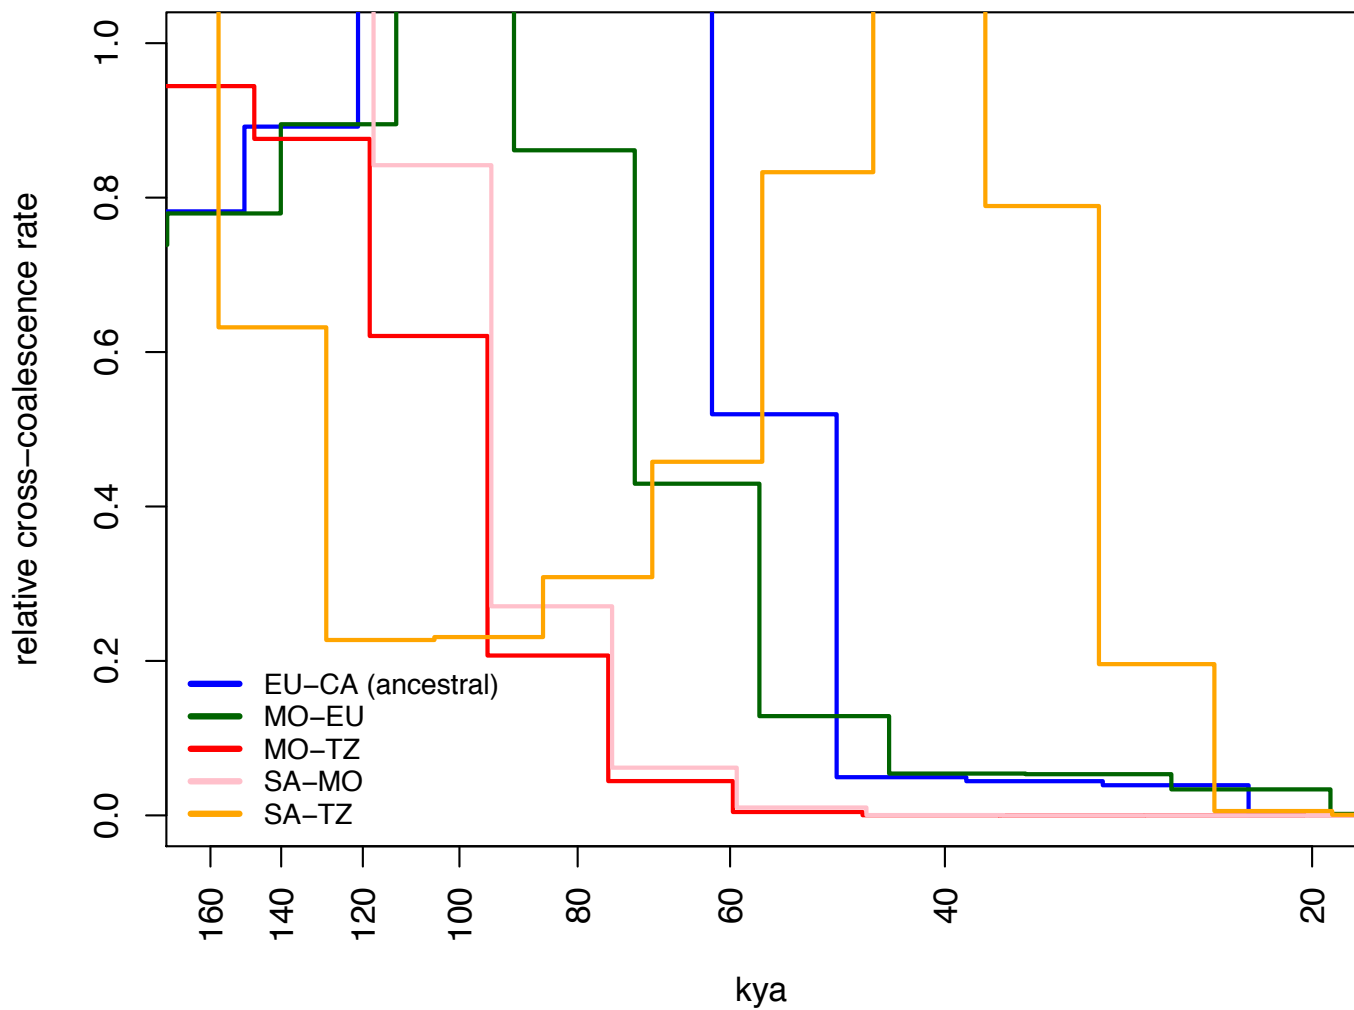

Supplementary Fig. 12

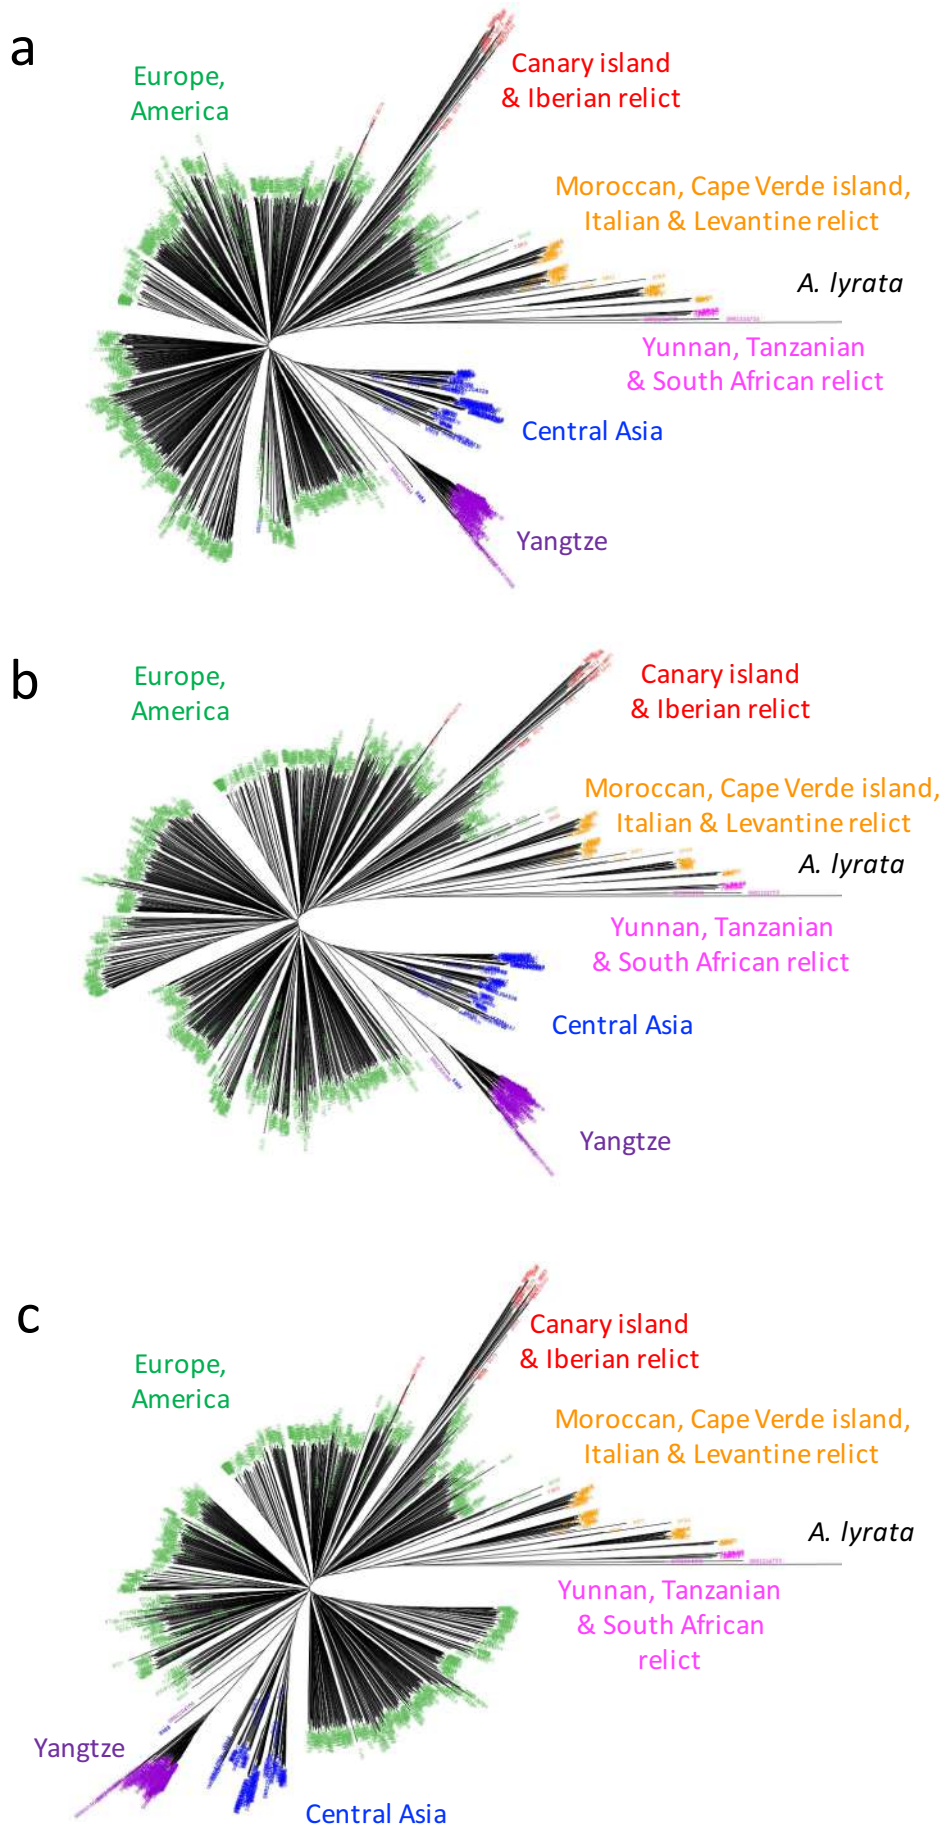

Source: https://www.biorxiv.org/content/10.1101/411108v1.full.pdf
